Reference-free cell-type deconvolution of pixel-resolution spatially resolved transcriptomics data

Brendan F. Miller<sup>1,2</sup>, Lyla Atta<sup>1,2,3</sup>, Arpan Sahoo<sup>1,4</sup>, Feiyang Huang<sup>1,2</sup>, Jean Fan<sup>1,2,4,\*</sup>

<sup>1</sup>Center for Computational Biology, Whiting School of Engineering, Johns Hopkins University, Baltimore, MD 21211, USA

<sup>2</sup>Department of Biomedical Engineering, Johns Hopkins University, Baltimore, MD 21218, USA

<sup>3</sup>Medical Scientist Training Program, Johns Hopkins University School of Medicine, Baltimore, MD 21205, USA

<sup>4</sup>Department of Computer Science, Johns Hopkins University, Baltimore MD 21218, USA

\*To whom correspondence should be addressed

Correspondence should be addressed to:

Jean Fan (jeanfan@jhu.edu)

Key words:

Bioinformatics, Computational biology, Gene expression, Single Cell, Deconvolution, Spatial Transcriptomics, Topic Modeling

# **Abstract**

Recent technological advancements have enabled spatially resolved transcriptomic profiling but at multi-cellular pixel resolution, thereby hindering the identification of cell-type spatial co-localization patterns. We developed STdeconvolve as an unsupervised approach to deconvolve underlying cell-types comprising such multi-cellular pixel resolution spatially resolved transcriptomics datasets. We show that STdeconvolve effectively recovers the putative transcriptomic profiles of cell-types and their proportional representation within spatially resolved pixels without reliance on external single-cell transcriptomics references.

# **Main**

Delineating the spatial organization of transcriptionally distinct cell-types within tissues is critical for understanding the cellular basis of tissue function<sup>1</sup>. Recent technologies have enabled spatially resolved transcriptome (ST) profiling within tissues at multi-cellular pixel-resolution<sup>2</sup>. As such, these ST measurements represent cell mixtures that may comprise multiple cell-types. This lack of single-cell resolution hinders the characterization of cell-type specific spatial organization. To address this challenge, supervised deconvolution approaches such as SPOTlight<sup>3</sup> and RCTD<sup>4</sup> have recently been developed to predict the proportion of cell-types within ST pixels. However, these supervised deconvolution approaches rely on the availability of a suitable single-cell reference, which may present limitations if such a reference does not exist due to budgetary, technical<sup>5</sup>, or biological limitations<sup>6</sup>. Here, we developed STdeconvolve (available at <https://github.com/JEFworks-Lab/STdeconvolve> and as Supplementary Software) as an unsupervised, reference-free approach for deconvolving multi-cellular pixel resolution ST data (Figure 1). Given a counts matrix of ST data, STdeconvolve infers the putative

transcriptomic profiles of distinct cell-types and their proportional representation within each multi-cellular spatially resolved ST pixel (Methods). Briefly, STdeconvolve first feature selects for genes likely to be informative of transcriptionally distinct cell-types. STdeconvolve then builds on Latent Dirichlet Allocation (LDA)<sup>7</sup> to estimate the number of transcriptionally distinct cell-types,  $K$ , and deconvolves these  $K$  cell-types across ST pixels. STdeconvolve leverages several unique features of ST data that make this application of LDA particularly amenable (Supplementary Note 1, 2).

As a proof of concept, we first evaluated the performance of STdeconvolve in recovering the proportional representations of cell-types and their transcriptomic profiles using simulated ST data. This was done by aggregating single-cell resolution multiplex error-robust fluorescence *in situ* hybridization (MERFISH) data of the mouse medial pre-optic area (MPOA)<sup>8</sup> into 100  $\mu\text{m}^2$  pixels (Figure 2A, Supplementary Figure S1A-B, S2, Methods). Applying STdeconvolve, we identified  $K=9$  transcriptionally distinct cell-types and deconvolved their transcriptomic profiles and proportional representation in each simulated pixel (Figure 2B, Supplementary Figure S1C, S3A). To infer the identities of the deconvolved cell-types for benchmarking purposes, we matched their deconvolved transcriptional profiles with the transcriptional profiles of ground truth cell-types (Methods) (Supplementary Figure S3B-C). We observed strong correlations between the transcriptomic profiles of each deconvolved cell-type and matched ground truth cell-type across genes (Figure 2C) and, likewise, between the proportions of each deconvolved cell-type and matched ground truth cell-type across simulated pixels (Figure 2D). Some deconvolved cell-types such as cell-types X2 and X8 both matched to excitatory neurons while cell-types X4 and X7 both matched to inhibitory neurons. Further partitioning the ground-truth excitatory and inhibitory cell-types into additional sub-types (76 total) based on previous

annotations<sup>8</sup> found that these deconvolved cell-types correlated with specific combinations of neuronal sub-types (Supplementary Figure S3D). When we further expanded the number of deconvolved cell-types to  $K=76$ , we were able to identify deconvolved cell-types that are highly correlated in terms of both transcriptional profiles and pixel proportions to finer neuronal subtypes as well as rare cell-types such as pericytes and microglia (Supplementary Figure 3E-F, Supplementary Note 2, 3). In addition, as current ST technologies allow for spatial transcriptomic profiling at varying resolutions<sup>2</sup>, we further simulated another ST dataset at 20  $\mu\text{m}^2$  resolution and observed similarly strong correlations between the deconvolved cell-type transcriptomic profiles and proportions with the ground truth by STdeconvolve (Supplementary Figure S4).

Using our simulated 100  $\mu\text{m}^2$  resolution ST data of the MPOA, we also compared STdeconvolve to existing supervised deconvolution approaches SPOTlight and RCTD. For an ideal single cell transcriptomics reference, we used the original single-cell MERFISH data. We evaluated the performance of each approach using the root-mean-square-error (RMSE) of the deconvolved cell-type proportions compared to ground truth across simulated pixels (Methods). In general, we find the performance of STdeconvolve to be comparable to SPOTlight and RCTD (Supplementary Fig. S5A). One potential limitation of such existing supervised deconvolution approaches is their reliance on a suitable single-cell reference. We thus sought to evaluate their performance when a suitable single-cell reference is not available by removing neuronal cell-types from the MERFISH single-cell reference. Reevaluating performance resulted in an increase in RMSE for both SPOTlight and RCTD (Supplementary Fig. S5B).

We next evaluated the performance of STdeconvolve by analyzing 100  $\mu\text{m}^2$  resolution ST data of the mouse main olfactory bulb (MOB)<sup>9</sup>. The MOB consists of multiple bilaterally

symmetric and transcriptionally distinct cell layers due to topographically organized sensory inputs<sup>10</sup>. While previous clustering analysis of MOB ST data revealed coarse spatial organization of coarse cell layers, finer structures such as the rostral migratory stream (RMS) could not be readily observed (Supplementary Figure S6A-B). We applied STdeconvolve to identify  $K=12$  transcriptionally distinct cell-types (Figure 2E, Supplementary Figure S6C) that either overlapped with or further split coarse cell layers previously identified from clustering analysis (Supplementary Fig S6D). In particular, while deconvolved cell-type X7 overlapped with the granule cell layer previously identified from clustering analysis, it was spatially placed where the RMS is expected<sup>11</sup> (Figure 2F). Upregulated genes in its deconvolved transcriptional profile, including *Nrep*, *Sox11*, and *Dcx*, are known to be associated with neuronal differentiation or upregulated in neuronal precursor cells within the RMS<sup>12</sup> and mark the expected spatial organization based on ISH staining<sup>13</sup> (Figure 2G, Supplementary Figure S6E). This suggests that deconvolved cell-type X7 corresponds to the neuronal precursor cell-type within the RMS unidentified from clustering analysis. Again, we compared STdeconvolve to SPOTlight and RCTD using an appropriate MOB scRNA-seq reference<sup>14</sup> and found a high degree of correspondence among all evaluated methods (Supplementary Figure S7).

We again compared the performance of such supervised deconvolution approaches when a suitable single-cell reference is lacking by removing olfactory ensheathing cells (OECs) from the MOB scRNA-seq reference. OECs were initially predicted to be enriched in the olfactory nerve layer by all evaluated methods (Supplementary Fig S8A-C). However, given this new reference without OECs, SPOTlight and RCTD erroneously predicted N2 cells to be enriched in the olfactory nerve layer and highly abundant (Supplementary Figure S8A, S8D) even though N2 cells were initially predicted to be rare by all methods. In addition, we trained SPOTlight and

RCTD on a scRNA-seq reference from the mouse cortex<sup>13</sup> resulting in the vascular leptomeningeal (VLMC) cell cluster of the cortex reference to be erroneously predicted as highly enriched in the olfactory nerve layer (Supplementary Figure S9). As such, supervised deconvolution approaches may be sensitive to the single-cell transcriptomics reference used.

Finally, to demonstrate the potential of an unsupervised, reference-free approach, we applied STdeconvolve to 100  $\mu\text{m}^2$  resolution ST data of 4 breast cancer sections<sup>15</sup>. Here, a matched scRNA-seq reference was not available and using a scRNA-seq reference from another breast cancer sample may be inappropriate due to potential inter-tumoral heterogeneity<sup>16</sup>.

Transcriptional clustering of the ST pixels previously identified 3 transcriptionally distinct clusters that corresponded to 3 histological regions of the tissue: ductal carcinoma *in situ*, invasive carcinoma, and non-malignant<sup>15</sup> (Supplementary Figure S10A-B). However, the tumor microenvironment is a complex milieu of many additional cell-types<sup>17</sup>. We applied STdeconvolve to identify additional cell-types and interrogate their spatial organization, resulting in  $K=15$  identified cell-types (Figure 3A, Supplementary Figure S10C). Of these, deconvolved cell-types X3, X13, and X15 corresponded spatially and had deconvolved transcriptional profiles consistent with the non-malignant, ductal in situ carcinoma, and invasive carcinoma annotations, respectively (Supplementary Figure S10D, S11). However, deconvolved cell-type X15 was spatially enriched at the interface of the cancerous and non-malignant regions of the tissue (Figure 3B). Highly expressed genes for deconvolved cell-type X15 included immune genes such as *CD74* and *CXCL10* and gene set enrichment analysis suggested significant enrichment in immune processes (Figure 3C-E, Supplementary Figure S12, Supplementary Table S1), suggesting that deconvolved cell-type 15 may correspond to immune cells. Such spatial organization of immune cells along a tumor boundary has been previously

implicated to play a role in breast cancer prognosis<sup>18</sup>. Therefore, STdeconvolve may be able to assist in deconvolving transcriptionally distinct cell-types in heterogeneous tissues to discover potentially clinically relevant spatial organization.

In conclusion, we have developed STdeconvolve as a tool for analyzing ST data to recover cell-type proportion and transcriptional profiles without reliance on single-cell transcriptomics references. We show that STdeconvolve can recapitulate expected biology and provide competitive performance to existing supervised methods when suitable single-cell references are available, as well as potentially superior performance when suitable single-cell references are not available. In general, we anticipate that STdeconvolve will help interrogate the spatial relationships between transcriptionally distinct cell-types in complex heterogeneous tissues.

## Methods

### STdeconvolve Overview

STdeconvolve uses latent Dirichlet allocation (LDA)<sup>7</sup>, a generative probabilistic model, to deconvolve the latent cell-types contained within multi-cellular pixels of spatially resolved transcriptome (ST) measurements. In this context, each pixel is defined as a mixture of  $K$  cell-types represented as a multinomial distribution of cell-type probabilities ( $\theta$ ), and each cell-type is defined as a probability distribution over the genes ( $\beta$ ) present in the ST dataset.

### LDA Modeling

The ST dataset is represented as a  $D \times V$  matrix of discrete gene counts for each pixel  $d$  and gene  $v$ . The number of total gene counts in a given pixel  $d$  is  $N_d$ .

As a generative probabilistic model, the LDA model generates a set of new pixels as follows:

For each pixel  $d$ :

- a. draw a cell-type distribution  $\theta_d \sim Dir(\alpha)$ , where  $\theta_d$  is a multinomial distribution of length  $K$  drawn from a uniform Dirichlet distribution with scaling parameter  $\alpha$ .
- b. for each gene count  $n$  in  $N_d$ :
  - i. draw cell-type  $k_{d,n} \sim mult(\theta_d)$
  - ii. draw gene  $v_{d,n} \sim mult(\beta_{k_{d,n}})$

The central goal is to identify the posterior distribution of the latent parameters given the input data, where for each pixel  $d$ :

$$p(\theta_d, \mathbf{k} \mid \mathbf{v}, \alpha, \beta) = \frac{p(\theta_d, \mathbf{k}, \mathbf{v} \mid \alpha, \beta)}{p(\mathbf{v} \mid \alpha, \beta)}$$

where  $\mathbf{k}$  is a vector of  $N_d$  cell-types associated with each gene in pixel  $d$ , and  $\mathbf{v}$  is the vector of  $N_d$  genes for pixel  $d$ . A variational expectation-maximization approach is used to estimate the values of the latent parameters<sup>7,19</sup>. By default,  $\beta$  is initialized with 0 for all cell-types and genes, and  $\alpha$  as  $50/K$ .

The resulting estimated  $\theta$  and  $\beta$  matrices represent the deconvolved proportions of cell-types in each pixel and the gene expression profiles for each cell-type, scaled to a library size of 1.  $\beta$



represents a  $K \times V$  gene-probability matrix for each cell-type  $k$  and each gene  $v$  with each row summing to 1. The  $\beta$  matrix can be multiplied by a scaling factor of one million to be more like conventional counts-per-million expression values for interpretability.  $\theta$  represents a  $D \times K$  pixel-cell-type proportion matrix for each pixel  $d$  and each cell-type  $k$ . LDA modeling in STdeconvolve is implemented through the 'topicmodels' R package<sup>19</sup>.

Of note, LDA inherently assumes for each pixel, there are a few cell-types present with high probability. We find this assumption reasonable for ST data due to the limited number of cells being captured within an ST pixel (Supplementary Fig. 1). Likewise, LDA assumes for each cell-type, there is a set of genes associated with high probability. Therefore, STdeconvolve uses feature selection for genes more likely to be associated with cell-types, which can improve cell-type deconvolution.

### Selection of genes for LDA model

To filter for genes that are more likely to be specifically expressed in particular cell-types to improve cell-type deconvolution by LDA, STdeconvolve first removes genes that are not detected in a sufficient number of pixels. By default, genes detected in less than 5% of pixels are removed. Because LDA attempts to identify tightly occurring, and ideally non-overlapping clusters of genes in the pixels, the most expressed genes in the dataset, as well as genes that are expressed in many pixels may also be removed. By default, genes detected in 100% of pixels are removed. STdeconvolve then selects for significantly overdispersed genes, or genes with higher-than-expected expression variance across pixels, as a means to detect transcriptionally distinct cell-types<sup>20</sup>. We assume that the proportion of cell-types will vary across pixels and thus

differences in their cell-type-specific transcriptional profiles manifest as overdispersed genes across pixels in the dataset. Additional gene filtering or cell-type specific marker genes to include in the input ST dataset may also be augmented by the user.

### Selection of LDA model with optimal number of cell-types

The number of cell-types  $K$  in the LDA model must be chosen *a-priori*. To determine the optimal number of cell-types  $K$  to set for an LDA model for a given dataset, we fit a set of LDA models using a different value for  $K$  over a user defined range of positive integers greater than 1. Additionally, users may select a held-out subset of pixels to then apply the fitted model to. We then compute the perplexity of each fitted model:

$$Perplexity(D) = \exp \left\{ - \frac{\log(p(D))}{\sum_{d=1}^D \sum_{v=1}^V n^{(dv)}} \right\}$$

Where  $p(D)$  is the likelihood of the dataset and  $n^{(dv)}$  is the gene count of gene  $v$  in pixel  $d$ . We can interpret  $p(D)$  as the posterior likelihood of the dataset conditional on the cell-type assignments using the final estimated  $\theta$  and  $\beta$ . The lower the perplexity, the better the model represents the real dataset. Thus, the trend between choice of  $K$  and the respective model perplexity can then serve as a guide. By default, the perplexity is computed by comparing  $p(D)$  to the entire input dataset used to estimate  $\theta$  and  $\beta$ .

In addition, STdeconvolve also reports the trend between  $K$  and the number of deconvolved cell-types with mean pixel proportions  $< 5\%$  (as default). We chose this default threshold based on the difficulty of STdeconvolve, SPOTlight, and RCTD to deconvolve cell-types at low proportions, (i.e., “rare” cell-types) (Supplementary Note 2). We note that as  $K$  is increased for fitted STdeconvolve models, the number of such “rare” cell-types generally increases. Such rare deconvolved cell-types are often distinguished by fewer distinct

transcriptional patterns in the data and may represent non-relevant or spurious subdivisions of primary cell-types. We can use this metric to help set an upper bound on  $K$ .

Generally, perplexity decreases and the number of “rare” deconvolved cell-types increases as  $K$  increases. Given these model perplexities and number of “rare” deconvolved cell-types for each tested  $K$ , the optimal  $K$  can then be determined by choosing the maximum  $K$  with the lowest perplexity while minimizing number of “rare” deconvolved cell-types. To further guide the choice of  $K$ , an inflection point (“knee”) is derived from the maximum second derivative of the plotted  $K$  versus perplexity plot and  $K$  versus number of “rare” deconvolved cell-types. We find that the optimal  $K$  is stable for models fitted to similar datasets, and that the deconvolved cell-types are highly similar in terms of their deconvolved transcriptional profiles (Supplementary Note 4). Ultimately, the choice of  $K$  is left up to the user and can be chosen taking into consideration prior knowledge of the biological system.

### **Simulating ST data from single-cell resolution spatially resolved MERFISH data**

MERFISH data of the mouse medial preoptic area (MPOA) was obtained from the original publication<sup>8</sup>. Normalized gene expression values were converted back to counts by dividing by 1000 and multiplying by each cell’s absolute volume. Datasets for an untreated female animal (FN7, datasets 171021\_FN7\_2\_M22\_M26 and 171023\_FN7\_1\_M22\_M26) containing counts for 135 genes assayed by MERFISH were used. Genes with non-count expression intensities assayed by sequential FISH were omitted. Counts of blank control measurements were also removed. Cells were previously annotated as being one of 9 major cell-types (astrocyte, endothelial, microglia, immature or mature oligodendrocyte, ependymal, pericyte, inhibitory neuron, excitatory neuron). Cells originally annotated as “ambiguous” were removed from the

dataset to ensure the ground truth was composed of cells with known cell-types. Because certain cell-types are only present in specific regions of the MPOA, we combined 12 tissue sections across the anterior and posterior regions to ensure that all expected cell-types would be present in the final simulated ST dataset. After filtering, the final dataset contained 59651 cells representing 9 total cell-types and counts for the 135 genes.

To simulate a multi-cellular pixel resolution ST dataset from such single-cell resolution spatially resolved MERFISH data, we generated a grid of squares, each square with an area of  $100 \mu\text{m}^2$ . Each square was considered a simulated pixel and the gene counts of cells whose x-y centroid was located within the coordinates of a square pixel were summed together. A grid of square pixels was generated for each of the 12 tissue sections separately and the simulated pixels for all 12 tissue sections were subsequently combined into a single ST dataset. For a given tissue section, the bottom edge of the grid was the lowest y-coordinate of the cell centroids and the left edge of the grid was the lowest x-coordinate. Square boundaries were then drawn from each of these edges in  $100 \mu\text{m}^2$  increments until the position of the farthest increment from the origin was greater than the highest respective cell centroid coordinate. After generating the grid, square pixels whose edges formed one of the outside edges of the grid were discarded in order to remove simulated pixels, which by virtue of their placement, encompassed space outside of the actual tissue sample. The retained pixels covered 49142 out of the original 59651 cells in the 12 tissue sections. This resulted in a simulated ST dataset with 3072 pixels by 135 genes. We used the original cell-type labels of each cell to compute the ground truth proportions in each simulated pixel. Likewise, to generate the ground truth transcriptional profiles of each cell-type, we averaged the gene counts for cells of the same cell-type from the original 59651 cells and normalized the resulting gene count matrix to sum to 1 for each cell-type. To simulate pixels of

20  $\mu\text{m}^2$ , an identical approach was taken using the same cells except that square boundaries were drawn from each edge in 20  $\mu\text{m}^2$  increments.

# **Deconvolution of simulated MERFISH ST data**

STdeconvolve was applied to the simulated MERFISH MPOA ST dataset. We selected the model with the  $K$  with the lowest perplexity and where the number of “rare” cell-types = 0 resulting in  $K = 9$  detected cell-types. To compare deconvolved cell-types to the ground truth cell-types in the simulated ST dataset, we computed the Pearson’s correlation between every combination of deconvolved cell-type and ground truth cell-type transcriptional profile. Likewise, the Pearson’s correlation between the pixel proportions of each deconvolved cell-type and ground truth cell-type was computed. After assignment of deconvolved to ground truth cell-types, the ranking of each gene based on its expression level in the transcriptional profile of the deconvolved or ground truth cell-type for each assigned match was compared.

## Annotation and matching of deconvolved and ground truth cell-types

Each deconvolved cell-type was first matched with the ground truth cell-type that had the highest Pearson’s correlation between their transcriptional profiles. This was done by computing the Pearson’s correlation between every combination of deconvolved and ground truth cell-type transcriptional profile.

The assignment of deconvolved cell-types to ground truth cell-types was confirmed by testing for enrichment of differentially upregulated genes of the ground truth cell-types in the deconvolved cell-type transcriptional profiles. To determine the differentially upregulated genes of the ground truth cell-types, ground truth transcriptional profiles were converted to counts per

thousand and low expressed genes, defined as those with average expression values less than 5, were removed. For each ground truth cell-type, the  $\log_2$  fold-change of each remaining gene with respect to the average expression across the other ground-truth cell-types was computed. Differentially upregulated genes were those with  $\log_2$  fold-change  $> 1$ . We performed rank-based gene set enrichment analysis of the ground truth upregulated gene sets in each deconvolved cell-type transcriptional profile using the 'liger' R package<sup>21</sup>. A match to a ground truth cell-type was confirmed and assigned if the ground truth gene set had the lowest gene set enrichment adjusted p-value that was at least  $< 0.05$ , followed by the highest positive enrichment score to break ties.

#### Comparison to SPOTlight and RCTD

For both SPOTlight and RCTD, a single cell transcriptomic profile reference was required. To construct this reference, the matrix of gene counts for the 49142 individual cells included in the simulated ST dataset and their predefined cell-type labels were input into the 'seurat' R package<sup>22</sup> (v4.0.1) as recommended in both the SPOTlight and RCTD pipelines. In SPOTlight, a minimum cell-type proportion threshold is set to remove cell-types contributing low amounts to pixels. To be consistent across methods, after deconvolution, cell-types in each pixel whose proportions were less than the lowest ground truth pixel proportion for a cell-type (2.5%) were removed, and the remaining cell-type proportions in a pixel were adjusted to sum to 1.

To compare the performance between STdeconvolve, SPOTlight, and RCTD, the root mean squared error (RMSE) was computed for each pixel between the deconvolved and matched ground truth cell-type proportions for each pixel in the ST dataset:

$$RMSE = \sqrt{\frac{\sum_{i=1}^n (\hat{y}_i - y_i)^2}{n}}$$

where  $n$  is the number of cell-types,  $\hat{y}_i$  is the predicted cell-type proportion for the cell-type  $i$ , and  $y_i$  is the ground truth cell-type proportion for the cell-type  $i$ .

To compare the accuracy of each method deconvolving individual cell-types, the RMSE between the predicted pixel proportions for a given cell-type and the matched ground truth cell-type proportions across MERFISH ST dataset pixels was computed. Here,  $n$  is the number of dataset pixels,  $\hat{y}_i$  is the predicted cell-type proportion for the given cell-type in pixel  $i$ , and  $y_i$  is the ground truth cell-type proportion for the given cell-type in pixel  $i$ . Because the RMSE scales with abundance, the RMSE for each cell-type were divided by the standard deviation of the pixel proportions for the corresponding ground truth-type to compare RMSEs across cell-types.

### **Deconvolution of simulated MERFISH ST data using a reference with missing cell-types**

To simulate a single-cell reference with missing cell-types, cells annotated as “excitatory” and “inhibitory” were removed from the previously constructed MERFISH single cell transcriptomic profile reference and used to train SPOTlight and RCTD as described under ‘*Comparison to SPOTlight and RCTD*’. The new trained models were then reapplied to the simulated ST MERFISH dataset of 3072 pixels for deconvolution. After deconvolution, cell-types in each pixel whose proportions were less than the lowest ground truth pixel proportion for a cell-type (2.5%) were removed and the remaining cell-type proportions were adjusted to sum to 1, as described previously. Pixel RMSEs were computed as described above based on the

deconvolved cell-type proportions and the ground truth dataset, which retained excitatory and inhibitory neuronal cell-types.

# **Deconvolution of ST data of the mouse olfactory bulb (MOB)**

Mouse olfactory bulb datasets were obtained from the original publication<sup>9</sup>. We focused on MOB replicate #8, as the primary MOB ST dataset in this work. We first removed genes with less than 100 reads detected across pixels and pixels with fewer than 100 total gene counts, resulting in a cleaned dataset of 260 pixels and 7365 genes. Overdispersed genes were determined were defined as genes with higher-than-expected observed expression variance across the pixels<sup>20</sup>. Expression variance was modeled based on the expression magnitude using a general additive model with a basis of 5. The p-value of a gene being overdispersed was determined using the cumulative distribution function of the  $\chi^2$  distribution with degrees of freedom equal to the number of pixels – 1. A gene was overdispersed if the multiple testing adjusted p-value was < 0.05. For MOB replicate #8, we obtained 255 overdispersed genes. We used STdeconvolve to fit LDA models with a range of integer  $K$ s from 2 to 20 and chose the model with  $K=12$ , which was within the range of  $K$ 's that produced the lowest perplexity and the number of “rare” cell-types with mean pixel proportion < 5% was 0 (Supplementary Figure S6C). After deconvolution, cell-types in each pixel whose proportions were less than 5% were removed and the remaining cell-type proportions in each pixel were adjusted to sum to 1. Without a ground truth reference, this filtering threshold was based on the variable performance of the different deconvolution methods to accurately deconvolve cell-types represented below this pixel proportion (Supplementary Note 2).



For SPOTlight and RCTD, we used a previously generated scRNA-seq reference of the MOB<sup>14</sup>. We retained only cells collected from untreated wildtype animals and the resulting matrix encompassed 17709 cells representing 38 previously annotated cell-type clusters and raw counts for 18560 genes. The trained models were then applied to deconvolve cell-types in the cleaned MOB replicate #8 ST dataset of 260 pixels and 7365 genes. After deconvolution, cell-types in each pixel whose proportions were less than 5% were removed and the remaining cell-type proportions were adjusted to sum to 1.

### **Deconvolution of ST data of the mouse olfactory bulb (MOB) using a reference with missing cell-types**

To simulate a single-cell reference with missing cell-types, cells of the MOB scRNA-seq reference that were part of “OEC” clusters 1-5 were removed. SPOTlight and RCTD were trained using this new reference and the newly trained models were then reapplied to the cleaned MOB replicate #8 ST dataset of 260 pixels and 7365 genes for deconvolution. After deconvolution, cell-types in each pixel whose proportions were less than 5% were removed and the remaining cell-type proportions were adjusted to sum to 1.

### **Deconvolution of ST data of the mouse olfactory bulb (MOB) using cortex reference**

For the scRNA-seq reference of the mouse cortex, we used the scRNA-seq cortex dataset provided by SPOTlight containing 1404 cells representing 23 transcriptionally distinct clusters and 34617 genes. SPOTlight and RCTD were trained using this reference and the newly trained models were then reapplied to the cleaned MOB replicate #8 ST dataset of 260 pixels and 7365

genes for deconvolution. After deconvolution, cell-types in each pixel whose proportions were less than 5% were removed and the remaining cell-type proportions were adjusted to sum to 1.

### **Comparison between STdeconvolve, SPOTlight, and RCTD**

As neither RCTD nor SPOTlight returns transcriptional profiles, we compared methods by evaluating the Pearson's correlation between the pixel proportions of each deconvolved cell-type from any two methods. Cell-type clusters based on the MOB reference that were deconvolved by RCTD or SPOTlight were matched to STdeconvolve cell-types that had the highest Pearson's correlation.

### **Deconvolution of ST data of breast cancer sections**

ST datasets of 4 breast cancer sections were obtained from the original publication<sup>15</sup>. Genes with less than 10 reads across pixels or pixels with less than 10 total reads were removed from each dataset and genes present in more than 95% of pixels for given dataset were removed. Overdispersed genes were determined for each dataset as described in '*Deconvolution of ST data of the mouse olfactory bulb (MOB)*' using the same parameters. After, we combined the 4 breast cancer datasets into a single dataset of 1029 pixels with counts for 372 genes found to be overdispersed in at least one dataset. We trained LDA models on this combined dataset with STdeconvolve using a range of  $K$  from 2 to 20 and selected  $K=15$ , which was within the range of  $K$ 's that produced the lowest perplexity and the number of "rare" cell-types with mean pixel proportion  $< 5\%$  was 0 (Supplementary Figure S10C).

### **Gene set enrichment analysis of deconvolved breast cancer cell-types**

To interpret the transcriptional profiles of the deconvolved cell-types in ST data of breast cancer sections, we used gene set enrichment analysis as implemented in the `liger` R package<sup>21</sup>. We filtered the list of 16771 Homo sapiens Gene Ontology gene set terms<sup>23</sup> to include those which contained at least 1 gene present in the input ST dataset corpus used with STdeconvolve, resulting in 4238 terms. We then performed iterative gene set enrichment analysis on the ranked expression profile of the genes as previously described in *Annotation and matching of deconvolved and ground truth cell-types*

### **Clustering analysis of ST pixels**

For clustering analysis of the MOB, using the cleaned MOB replicate #8 ST dataset of 260 pixels and 7365 genes, the raw counts were normalized to counts per million and adjusted to a log<sub>10</sub> scale with pseudo count 1. Subsequently, dimensionality reduction using PCA was performed, and pixels were visualized using 2-D embedding with t-SNE on the top 5 principal components and perplexity = 30. Graph-based cluster detection using Louvain clustering<sup>24</sup> was performed using the top 5 principal components with the maximum number of nearest neighbors equal to 30, resulting in the assignment of pixels to 5 clusters, which were manually annotated based on the physical locations of the pixel clusters on the MOB tissue section<sup>9</sup>.

For clustering analysis of the breast cancer sections, we took the combined dataset of 1029 pixels and 372 overdispersed genes, and log<sub>10</sub> transformed with pseudo count of 1, and dimensionality reduction using PCA was performed. In a manner similar to the original publication, pixels were clustered into 3 groups using the “Ward.D” method and the Euclidean distance calculated using the first 2 principle components This resulted in the assignment of

pixels to 3 clusters which corresponded to the annotations of the 3 histological sections previously annotated by pathologists<sup>15</sup>.

#### **Availability of Code**

STdeconvolve is available as an open-source R software package<sup>25</sup> with the source code available in the Supplemental Material and on GitHub at <https://github.com/JEFworks-Lab/STdeconvolve>. Additional documentation and tutorials are available at <https://jef.works/STdeconvolve/>

# References

- 1 Zhuang, X. Spatially resolved single-cell genomics and transcriptomics by imaging. *Nat Methods* **18**, 18-22, doi:10.1038/s41592-020-01037-8 (2021).
- 2 Larsson, L., Frisen, J. & Lundeberg, J. Spatially resolved transcriptomics adds a new dimension to genomics. *Nat Methods* **18**, 15-18, doi:10.1038/s41592-020-01038-7 (2021).
- 3 Elosua-Bayes, M., Nieto, P., Mereu, E., Gut, I. & Heyn, H. SPOTlight: seeded NMF regression to deconvolute spatial transcriptomics spots with single-cell transcriptomes. *Nucleic Acids Res*, doi:10.1093/nar/gkab043 (2021).
- 4 Cable, D. M. *et al.* Robust decomposition of cell type mixtures in spatial transcriptomics. *Nat Biotechnol*, doi:10.1038/s41587-021-00830-w (2021).
- 5 Kiemen, A. *et al.* In situ characterization of the 3D microanatomy of the pancreas and pancreatic cancer at single cell resolution. *bioRxiv*, 2020.2012.2008.416909, doi:10.1101/2020.12.08.416909 (2020).
- 6 Nguyen, Q. H., Pervolarakis, N., Nee, K. & Kessenbrock, K. Experimental Considerations for Single-Cell RNA Sequencing Approaches. *Front Cell Dev Biol* **6**, 108, doi:10.3389/fcell.2018.00108 (2018).
- 7 Blei, D. M. a. N., Andrew Y and Jordan, Michael I. Latent dirichlet allocation. *The Journal of Machine Learning Research* **3**, 993-1022 (2003).
- 8 Moffitt, J. R. *et al.* Molecular, spatial, and functional single-cell profiling of the hypothalamic preoptic region. *Science* **362**, doi:10.1126/science.aau5324 (2018).

- 9 Stahl, P. L. *et al.* Visualization and analysis of gene expression in tissue sections by spatial transcriptomics. *Science* **353**, 78-82, doi:10.1126/science.aaf2403 (2016).
- 10 Nagayama, S., Homma, R. & Imamura, F. Neuronal organization of olfactory bulb circuits. *Front Neural Circuits* **8**, 98, doi:10.3389/fncir.2014.00098 (2014).
- 11 Hintiryan, H. *et al.* Comprehensive connectivity of the mouse main olfactory bulb: analysis and online digital atlas. *Front Neuroanat* **6**, 30, doi:10.3389/fnana.2012.00030 (2012).
- 12 Wang, C. *et al.* Identification and characterization of neuroblasts in the subventricular zone and rostral migratory stream of the adult human brain. *Cell Res* **21**, 1534-1550, doi:10.1038/cr.2011.83 (2011).
- 13 Lein, E. S. *et al.* Genome-wide atlas of gene expression in the adult mouse brain. *Nature* **445**, 168-176, doi:10.1038/nature05453 (2007).
- 14 Tepe, B. *et al.* Single-Cell RNA-Seq of Mouse Olfactory Bulb Reveals Cellular Heterogeneity and Activity-Dependent Molecular Census of Adult-Born Neurons. *Cell Rep* **25**, 2689-2703 e2683, doi:10.1016/j.celrep.2018.11.034 (2018).
- 15 Yoosuf, N., Navarro, J. F., Salmen, F., Stahl, P. L. & Daub, C. O. Identification and transfer of spatial transcriptomics signatures for cancer diagnosis. *Breast Cancer Res* **22**, 6, doi:10.1186/s13058-019-1242-9 (2020).
- 16 Karaayvaz, M. *et al.* Unravelling subclonal heterogeneity and aggressive disease states in TNBC through single-cell RNA-seq. *Nat Commun* **9**, 3588, doi:10.1038/s41467-018-06052-0 (2018).

- 17 Wei, R., Liu, S., Zhang, S., Min, L. & Zhu, S. Cellular and Extracellular Components in Tumor Microenvironment and Their Application in Early Diagnosis of Cancers. *Anal Cell Pathol (Amst)* **2020**, 6283796, doi:10.1155/2020/6283796 (2020).
- 18 Keren, L. *et al.* A Structured Tumor-Immune Microenvironment in Triple Negative Breast Cancer Revealed by Multiplexed Ion Beam Imaging. *Cell* **174**, 1373-1387 e1319, doi:10.1016/j.cell.2018.08.039 (2018).
- 19 Grün, B. & Hornik, K. topicmodels: An R Package for Fitting Topic Models. *2011* **40**, 30, doi:10.18637/jss.v040.i13 (2011).
- 20 Fan, J. *et al.* Characterizing transcriptional heterogeneity through pathway and gene set overdispersion analysis. *Nat Methods* **13**, 241-244, doi:10.1038/nmeth.3734 (2016).
- 21 Fan, J. Differential Pathway Analysis. *Methods Mol Biol* **1935**, 97-114, doi:10.1007/978-1-4939-9057-3\_7 (2019).
- 22 Hao, Y. *et al.* Integrated analysis of multimodal single-cell data. *bioRxiv*, 2020.2010.2012.335331, doi:10.1101/2020.10.12.335331 (2020).
- 23 Liberzon, A. *et al.* Molecular signatures database (MSigDB) 3.0. *Bioinformatics* **27**, 1739-1740, doi:10.1093/bioinformatics/btr260 (2011).
- 24 Blondel, V. D., Guillaume, J.-L., Lambiotte, R. & Lefebvre, E. Fast unfolding of communities in large networks. *Journal of Statistical Mechanics: Theory and Experiment* **2008**, P10008, doi:10.1088/1742-5468/2008/10/p10008 (2008).
- 25 Team, R. C. R: A language and environment for statistical computing. *R Foundation for Statistical Computing* (2021).

## Main Figures

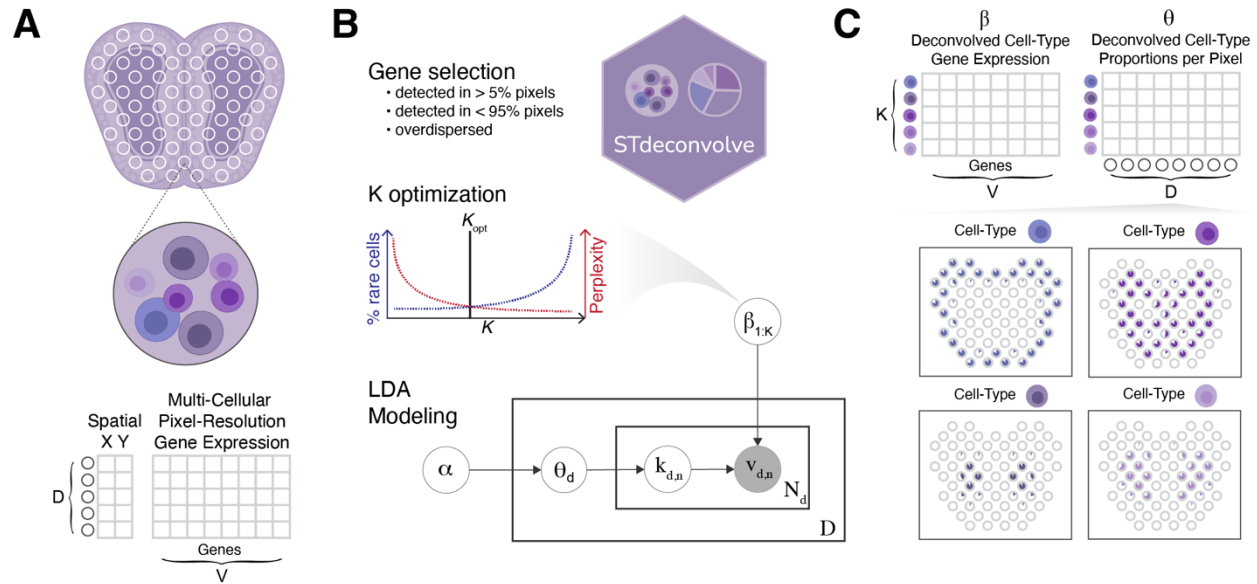

Figure 1. Overview of STdeconvolve.

- A. STdeconvolve takes as input a spatial transcriptomics (ST) dataset of  $D$  pixels (rows) and counts of  $V$  genes (columns). A matrix of spatial coordinates for each of the  $D$  pixel can also be used for visualization.
- B. STdeconvolve first feature selects genes to retain in the input matrix for deconvolution, such as genes with counts in more than 5% and less than 95% of the pixels, and overdispersed across the pixels. To determine the optimal number of cell-types to be deconvolved,  $K$ , STdeconvolve fits multiple LDA models to the input dataset each with a different  $K$ . STdeconvolve computes the perplexity and number of rare deconvolved cell-types to guide the selection of the model with the optimal  $K$ . A graph representation of LDA modeling is shown, where  $\beta_{1:K}$  is a  $K \times V$  gene-probability matrix for each cell-type  $k$  and each input matrix gene  $v$ ;  $D$  is the number of pixels in the dataset;  $N_d$  is the total gene counts in pixel  $d$ ;  $\alpha$  is the Dirichlet distribution scaling parameter;  $\theta_d$  is the multinomial distribution of cell-type proportions in pixel  $d$  drawn from  $Dir(\alpha)$ ;  $k_{d,n}$  is a



drawn cell-type from  $mult(\theta_d)$  for the  $n^{\text{th}}$  gene count in pixel  $d$ ;  $v_{d,n}$  is a count of gene  $v$  drawn from gene-probability  $mult(\beta_{k_{d,n}})$ , given the cell-type  $k_{d,n}$ . (See Methods for details). Shaded circle indicates observed variables and clear circles indicate latent variables.

C. STdeconvolve outputs two matrices: (1)  $\beta$ , the deconvolved transcriptional profile matrix of  $K$  cell-types over genes  $V$ , and (2)  $\theta$ , the proportions of  $K$  cell-types across the  $D$  pixels. The proportion of deconvolved cell-types can then be visualized across the pixels.

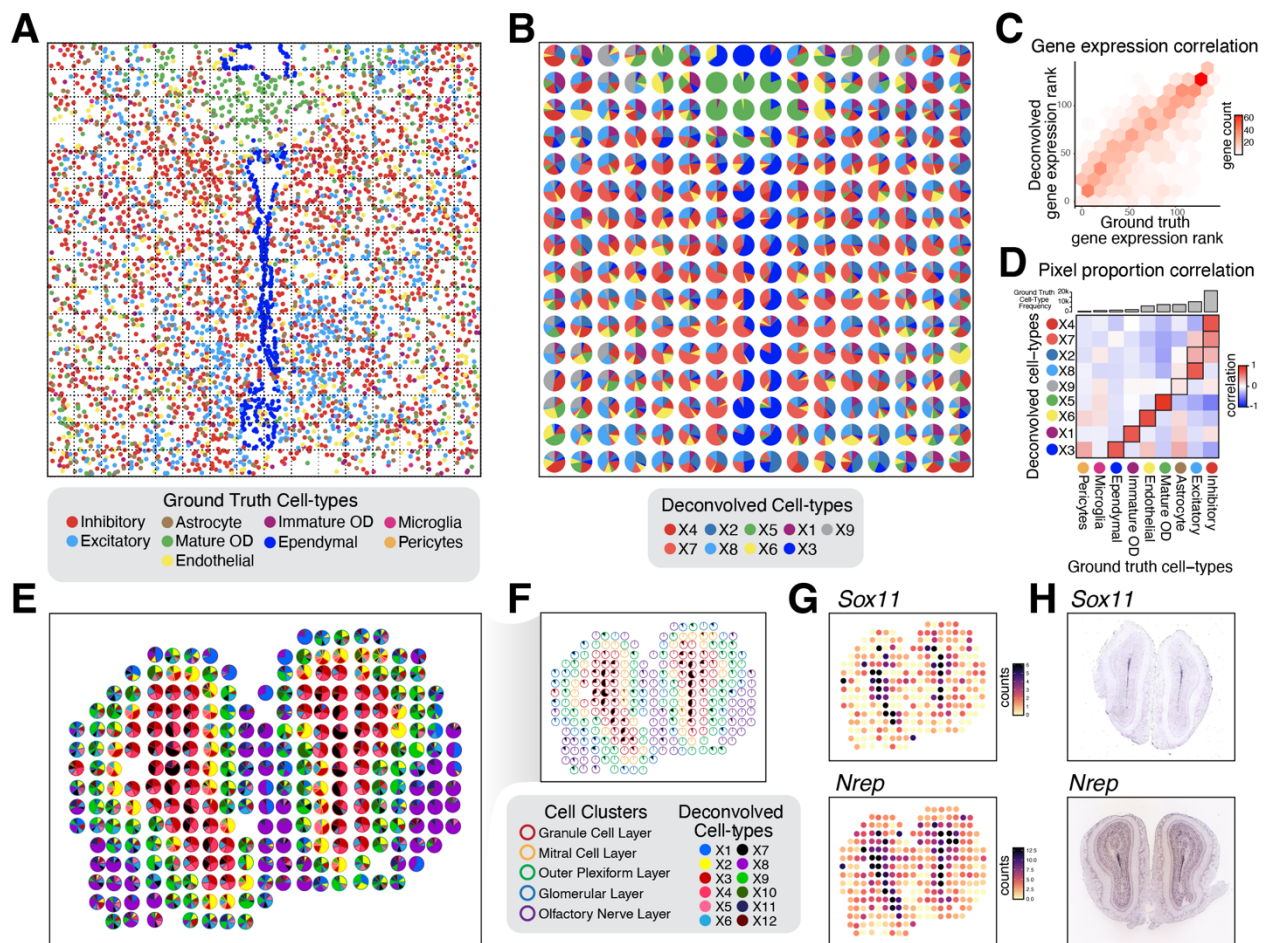

Figure 2. STdeconvolve characterizes the spatial organization of cell-types in simulated and real ST data.

A. Ground truth single-cell resolution MERFISH data of one section of the MPOA

partitioned into 100  $\mu\text{m}^2$  pixels (black dashed squares). Each dot is a single cell colored by its ground truth cell-type label.

B. Proportions of deconvolved cell-types from STdeconvolve, represented as pie charts for each simulated pixel.

C. The ranking of each gene based on its expression level in the transcriptional profiles of the deconvolved cell-types, compared to its gene rank in the transcriptional profile of the matched ground truth cell-type.

- D. Heatmap of Pearson’s correlations between the proportions of the deconvolved cell-types and ground truth cell-types across simulated pixels. Ground truth cell-types are ordered by their frequencies in the ground truth dataset. Matched deconvolved and ground truth cell-types are boxed.
- E. Deconvolved cell-type proportions for ST data of the MOB from STdeconvolve, represented as pie charts for each ST pixel. Pixels are outlined with colors based on the pixel transcriptional cluster assignment corresponding to MOB coarse cell layers.
- F. Highlight of deconvolved cell-type X7. Pixel proportion of deconvolved cell-type X7 are indicated as black slices in pie charts. Pixels are outlined with colors as in E).
- G. Gene counts in each pixel of the MOB ST dataset for deconvolved cell-type X7’s select top marker genes *Sox11* and *Nrep*.
- H. Corresponding ISH images for deconvolved cell-type X7’s top marker genes *Sox11* and *Nrep* from the Allen Brain Atlas<sup>13</sup>.

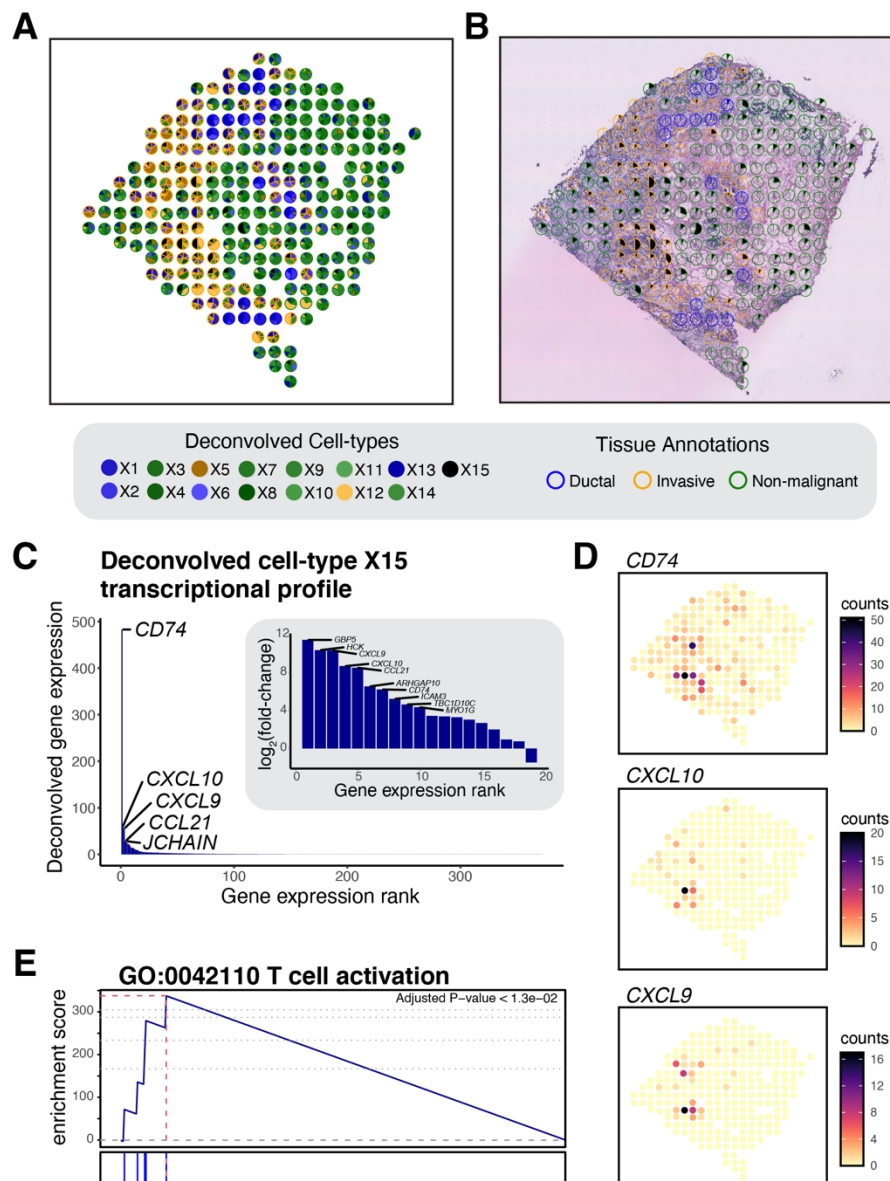

Figure 3. STdeconvolve characterizes the spatial organization of immune cells in breast cancer ST data.

A. Deconvolved cell-type pixel proportions for ST data of a breast cancer tissue section, represented as pie charts. Pixels are outlined with colors based on the pixel transcriptional cluster assignment corresponding to 3 pathological annotations.

- B. Highlight of deconvolved cell-type X15. Pixel proportion of deconvolved cell-type X15 are indicated as black slices in pie charts. Pixels are outlined with colors as in A). An H&E-stained image of the breast cancer tissue is shown in the background.
- C. Barplot of the deconvolved transcriptional profile of deconvolved cell-type X15 ordered by magnitude of deconvolved gene expression. Inset represents the log<sub>2</sub> fold-change of the deconvolved transcriptional profile genes with respect to the mean expression of the other 14 deconvolved cell-type transcriptional profiles. Select highly expressed and high fold-change genes are labeled.
- D. Gene counts in each pixel of the breast cancer ST dataset for deconvolved cell-type X15's select top marker genes.
- E. Gene set enrichment plot for significantly enriched GO term "T cell activation" for deconvolved cell-type X15's transcriptional profile.
