1 Reference-free cell-type deconvolution of multi-cellular pixel-resolution spatially resolved  
2 transcriptomics data

3

4 Brendan F. Miller<sup>1,2</sup>, Feiyang Huang<sup>1,2</sup>, Lyla Atta<sup>1,2</sup>, Arpan Sahoo<sup>1,3</sup>, Jean Fan<sup>1,2,3,\*</sup>

5 <sup>1</sup>Center for Computational Biology, Whiting School of Engineering, Johns Hopkins University,  
6 Baltimore, MD 21211, USA

7 <sup>2</sup>Department of Biomedical Engineering, Johns Hopkins University, Baltimore, MD 21218, USA

8 <sup>3</sup>Department of Computer Science, Johns Hopkins University, Baltimore MD 21218, USA

9 \*To whom correspondence should be addressed

10

11 Correspondence should be addressed to:

12 Jean Fan (jeanfan@jhu.edu)

13

14 Key words:

15 Bioinformatics, Computational biology, Gene expression, Single Cell, Deconvolution, Spatial

16 Transcriptomics, Topic Modeling

17

18

19

20 **Abstract**

21 Recent technological advancements have enabled spatially resolved transcriptomic profiling but  
22 at multi-cellular pixel resolution, thereby hindering the identification of cell-type-specific spatial  
23 patterns and gene expression variation. To address this challenge, we developed STdeconvolve  
24 as a reference-free approach to deconvolve underlying cell-types comprising such multi-cellular  
25 pixel resolution spatial transcriptomics (ST) datasets. Using simulated as well as real ST datasets  
26 from diverse spatial transcriptomics technologies comprising a variety of spatial resolutions such  
27 as Spatial Transcriptomics, 10X Visium, DBiT-seq, and Slide-seq, we show that STdeconvolve  
28 can effectively recover cell-type transcriptional profiles and their proportional representation  
29 within pixels without reliance on external single-cell transcriptomics references. STdeconvolve  
30 provides comparable performance to existing reference-based methods when suitable single-cell  
31 references are available, as well as potentially superior performance when suitable single-cell  
32 references are not available. STdeconvolve is available as an open-source R software package  
33 with the source code available at <https://github.com/JEFworks-Lab/STdeconvolve>.

34

## 35 **Introduction**

36 Delineating the spatial organization of transcriptionally distinct cell-types within tissues  
37 is critical for understanding the cellular basis of tissue function<sup>1</sup>. Recent technologies have  
38 enabled spatial transcriptomic (ST) profiling within tissues at multi-cellular pixel-resolution<sup>2</sup>. As  
39 such, these ST measurements represent cell mixtures that may comprise multiple cell-types. This  
40 lack of single-cell resolution hinders the characterization of cell-type specific spatial  
41 organization and gene expression variation.

42 To address this challenge, several reference-based, supervised and semi-supervised  
43 deconvolution approaches have recently been developed to predict the proportion of cell-types  
44 within ST pixels. Of these, SPOTlight<sup>3</sup> uses cell-type marker genes derived from a single-cell  
45 RNA-sequencing (scRNA-seq) reference to seed a non-negative matrix factorization. RCTD<sup>4</sup>  
46 uses the cell-type specific mean expression of marker genes derived from a scRNA-seq reference  
47 to build a probabilistic model of the contribution of each cell-type to the observed gene counts in  
48 each pixel. SpatialDWLS<sup>5</sup> uses cell-type signature genes derived from a scRNA-seq reference to  
49 first enrich for cell-types likely to be in each pixel, then applies a dampened weighted least  
50 squares approach to infer the cell-type composition. DSTG<sup>6</sup> uses synthetic pseudo-mixtures of  
51 scRNA-seq references to train a semi-supervised graph-based convolutional network. As such,  
52 these approaches rely on the availability of a suitable single-cell reference, which may present  
53 limitations if such a reference does not exist due to budgetary, technical<sup>7</sup>, or biological  
54 limitations<sup>8</sup>. While the rise of scRNA-seq references through atlasing efforts such as the BRAIN  
55 Initiative Cell Census Network (BICCN)<sup>9</sup>, the Human BioMolecular Atlas Program  
56 (HuBMAP)<sup>10</sup>, and Human Cell Atlas<sup>11</sup> may help alleviate such limitations particularly for  
57 healthy tissues, processing independent tissue samples or different sections of the same tissue

58 may still result in systematically different gene expression quantifications due to batch effects as  
59 well as inter- and intra-sample heterogeneity. Additionally, difficulties dissociating and capturing  
60 certain cell-types via single-cell sequencing may result in missing or inconsistent cell-types  
61 between scRNA-seq references and ST datasets<sup>12,13</sup>. Further, scRNA-seq references and ST  
62 datasets may be affected by different perturbations manifesting as distinct transcriptional  
63 differences affecting reference-based deconvolution accuracy and subsequent biological  
64 interpretations. As such, a reference-free deconvolution approach provides an alternative strategy  
65 for deconvolving cell-types when an appropriate reference is not available.

66         Here, we developed STdeconvolve (available at [https://github.com/JEFworks-](https://github.com/JEFworks-Lab/STdeconvolve)  
67 Lab/STdeconvolve and as Supplementary Software) as a reference-free, unsupervised approach  
68 for deconvolving multi-cellular pixel resolution ST data (Figure 1). STdeconvolve builds on  
69 latent Dirichlet allocation (LDA), a generative statistical model commonly used in natural  
70 language processing for discovering latent topics in collections of documents. In the context of  
71 natural language processing, given a count matrix of words in documents, LDA infers the  
72 distribution of words for each topic and the distribution of topics in each document. In the  
73 context of ST data, given a count matrix of gene expression in multi-cellular ST pixels,  
74 STdeconvolve applies LDA to infer the putative transcriptional profile for each cell-type and the  
75 proportional representation of each cell-type in each multi-cellular ST pixel (Methods). While  
76 LDA has previously been applied in the context of deconvolving cell-types in bulk RNA-seq  
77 data<sup>14</sup>, STdeconvolve leverages several unique features of ST data that make this application of  
78 LDA particularly amenable (Supplementary Note 1). Briefly, these include i) the limited number  
79 of cells and cell-types represented in each ST pixel, ii) the limited impact of batch effects on the  
80 measured gene expression across pixels, iii) the large number of pixels compared to cell-types,

81 and iv) the likely heterogeneity of cell-type proportional distribution across pixels in tissues. To  
82 improve the application of LDA, where latent cell-types are characterized by co-expressed and  
83 ideally non-overlapping groups of genes, STdeconvolve feature selects for such genes likely to  
84 be informative of latent cell-types. Specifically, STdeconvolve selects for significantly  
85 overdispersed genes, or genes with higher-than-expected expression variance across pixels<sup>15</sup>  
86 (Methods). In addition, as the application of LDA requires the number of transcriptionally  
87 distinct cell-types,  $K$ , to be set *a priori*, STdeconvolve provides several data-driven metrics to  
88 guide the estimation of an appropriate  $K$  (Methods, Supplementary Note 2).

89

## 90 **Results**

### 91 **STdeconvolve accurately recovers cell-type proportions and transcriptional profiles in** 92 **simulated ST data**

93 As a proof of concept, we first evaluated the performance of STdeconvolve in recovering  
94 the proportional representations of cell-types and their transcriptional profiles using simulated  
95 ST data. We simulated ST data by aggregating the gene expression of cells from single-cell  
96 resolution multiplex error-robust fluorescence *in situ* hybridization (MERFISH) data of the  
97 mouse medial pre-optic area (MPOA)<sup>16</sup> within spatially contiguous pixels. Previously,  
98 MERFISH was previously applied to map the spatial distribution of 135 select genes within  
99 MPOA brain tissue. These select 135 genes were chosen to distinguish between major non-  
100 neuronal cell-types as well as neuronal subtypes. Imaging-based cell segmentation was  
101 performed and the counts of genes per cell were quantified to achieve single-cell resolution  
102 spatially resolved transcriptomic profiling. Subsequent transcriptional clustering analysis on the  
103 single-cell resolution gene expression measurements identified 9 major cell-types, including

104 excitatory and inhibitory neurons. Further clustering found that these excitatory and inhibitory  
105 neurons could be subdivided into 69 finer neuronal sub-types.

106 To simulate multi-cellular pixel-resolution ST data, we aggregated the single-cell  
107 resolution MERFISH data into  $100 \mu\text{m}^2$  pixels (Figure 2A, Supplementary Figure S1A-B,  
108 Methods). Given the already limited 135 gene panel chosen to distinguish between cell-types,  
109 additional feature selection for this dataset was not necessary (Supplementary Note 3). Applying  
110 STdeconvolve, we identified  $K=9$  cell-types and deconvolved their proportional representation  
111 and transcriptional profiles in each simulated pixel (Figure 2B, Supplementary Figure S1C, S2A,  
112 Supplementary Methods). To infer the identities of the deconvolved cell-types for benchmarking  
113 purposes, we matched their deconvolved transcriptional profiles with the transcriptional profiles  
114 of ground truth cell-types by testing for enrichment of ground truth cell-type specific marker  
115 genes (Methods, Supplementary Figure S2B). We observed strong correlations between the  
116 transcriptional profiles of each deconvolved cell-type and matched ground truth cell-type across  
117 genes (Figure 2C). Likewise, we observed strong correlations between the proportions of each  
118 deconvolved cell-type and matched ground truth cell-type across simulated pixels (Figure 2D).  
119 We further quantified this performance using the root-mean-square-error (RMSE) of the  
120 deconvolved cell-type proportions compared to ground truth across simulated pixels (Methods,  
121 Figure 2E). In this manner, STdeconvolve can accurately recover the proportional representation  
122 and transcriptional profiles of major cell-types.

123

124 **STdeconvolve achieves competitive performance to reference-based, supervised**

125 **deconvolution approaches**

126           We next sought to compare the performance of STdeconvolve to existing reference-  
127 based, supervised and semi-supervised deconvolution approaches SPOTlight, RCTD,  
128 spatialDWLS, and DTSG using our simulated 100  $\mu\text{m}^2$  resolution ST data of the MPOA. As  
129 described previously, these approaches require a single-cell transcriptomics reference for  
130 deconvolution. As an ideal single-cell transcriptomics reference, we used the original single-cell  
131 MERFISH data that was used to construct the simulated ST data (Supplementary Figure S3A,  
132 Supplementary Methods). We again quantified the performance of each approach using the  
133 RMSE of the deconvolved cell-type proportions compared to ground truth across simulated  
134 pixels. DSTG was unable to deconvolve distinct cell-types in the data and was omitted from  
135 further comparison (Supplementary Figure S3A). In general, we find the performance of  
136 STdeconvolve to be comparable to these reference-based deconvolution approaches when such  
137 an ideal single-cell transcriptomics reference is used (Figure 2E-F).

138           One potential limitation of such existing reference-based deconvolution approaches is  
139 their reliance on a suitable single-cell transcriptomics reference. We thus sought to evaluate the  
140 performance of these reference-based deconvolution approaches when a suitable single-cell  
141 reference is not available. To this end, we removed excitatory and inhibitory neuronal cell-types  
142 to simulate a less suitable single-cell transcriptomics reference (Supplementary Methods). We  
143 then deconvolved the simulated ST data of the MPOA using each reference-based deconvolution  
144 approach with this new reference and computed the RMSE across pixels. Because STdeconvolve  
145 does not use a reference, its performance does not change. However, the performance for all  
146 reference-based deconvolution approaches resulted in a significantly higher RMSE (Diebold-  
147 Mariano  $p$ -value  $< 2.2 \times 10^{-16}$ ) than STdeconvolve (Figure 2G). Likewise, pixels previously  
148 comprised of neurons were now erroneously predicted by reference-based deconvolution

149 approaches to be comprised primarily of immature oligodendrocytes (Supplementary Figure  
150 S3B). In addition, we evaluated the performance of each reference-based deconvolution  
151 approach after removing rarer ependymal cells from the single-cell transcriptomics reference.  
152 Again, given this less suitable single-cell transcriptomics reference, pixels previously comprised  
153 of ependymal cells were now erroneously predicted by reference-based deconvolution  
154 approaches to be comprised primarily of astrocytes (Supplementary Figure S3C). Thus, the  
155 performance of reference-based deconvolution approaches is sensitive to differences in cell-type  
156 composition between the ST data and the single-cell transcriptomics reference used.

157         Likewise, such an ideal single-cell transcriptomics reference that optimally matches the  
158 cell-type composition and measurement sensitivities of the ST data to be deconvolved may not  
159 be available. Therefore, this ideal MERFISH MPOA single-cell transcriptomics reference likely  
160 provides an upper bound on performance for reference-based deconvolution approaches. To  
161 provide a more realistic evaluation of performance for reference-based deconvolution  
162 approaches, we sought to deconvolve our simulated ST data of the MPOA using a scRNA-seq  
163 reference from a mouse brain atlasing effort<sup>17</sup>. Again, as a reference-free deconvolution  
164 approach, the performance of STdeconvolve does not change. However, again, the performance  
165 for all reference-dependent methods resulted in a significantly higher RMSE (Diebold-Mariano  
166  $p$ -value  $< 2.2 \times 10^{-16}$ ) than STdeconvolve (Figure 2H, Supplementary Methods). Thus,  
167 STdeconvolve achieves comparable performance to reference-based, supervised deconvolution  
168 approaches when an ideal single-cell transcriptomics reference is used, and potentially better  
169 performance when an ideal single-cell transcriptomics reference is not used.

170

171 **STdeconvolve recovers perturbation specific gene expression profiles**



172            Though reference-based deconvolution approaches may accurately recover cell-type  
173 proportions in ST data, they currently do not deconvolve cell-type specific gene expression  
174 profiles. Nonetheless, perturbations may induce cell-type-specific transcriptional changes in ST  
175 data that would not be identifiable by current reference-based deconvolution approaches unless  
176 perturbation-matched single-cell transcriptomics references are used. While the availability of  
177 scRNA-seq references grows due to single-cell atlasing initiatives, these datasets primarily  
178 represent collections of healthy tissues<sup>9-11,18,19</sup>. As such, there is a particular scarcity of suitable  
179 scRNA-seq references available for reference-based deconvolution of ST data in the context of  
180 disease and other perturbations.

181            In contrast to current reference-based deconvolution approaches, STdeconvolve can  
182 estimate cell-type transcriptional profiles in a manner that is not constrained by the expression  
183 profiles of specific cell-types defined in single-cell transcriptomics references. We therefore  
184 sought to explore the potential of STdeconvolve in detecting these perturbation-driven cell-type-  
185 specific gene expression changes using simulated ST data from mixtures of single cells assayed  
186 by scRNA-seq (Figure 3A, Supplementary Methods). Briefly, we took advantage of scRNA-seq  
187 data previously collected from mammary tissues of aged and young mice<sup>20</sup>. Previous  
188 transcriptional clustering analysis revealed a subpopulation of macrophages with age-associated  
189 gene expression changes. Specifically, aged macrophages upregulated *Cd274* and *Clec4d*, and  
190 downregulated *Coro1a* compared to young macrophages. Therefore, we simulated ST data of  
191 aged tissue using mixtures of aged macrophages and other luminal cells and ST data of young  
192 tissue using mixtures of young macrophages and other luminal cells (Figure 3B). We then sought  
193 to evaluate the ability of STdeconvolve to recover these age-associated gene expression changes  
194 in macrophages (Supplementary Methods). Applying STdeconvolve using  $K=2$  cell-types to the

195 simulated ST data of both aged and young tissue, we found that the deconvolved transcriptional  
196 profiles were highly correlated with the matched ground truth gene expression profiles from  
197 scRNA-seq in all cases (Supplementary Figure S4A-B). Further, when we compared the  
198 deconvolved transcriptional profiles of aged versus young macrophages, we were able to identify  
199 upregulated genes included *Cd274* and *Clec4d*, and downregulated genes included *Coro1a*,  
200 consistent with the original study (Figure 3C). Thus, STdeconvolve can potentially recover  
201 perturbation-driven cell-type-specific gene expression changes in ST data.

202

### 203 **Deconvolution provides distinct insights compared to clustering analysis**

204 Generally, we note that deconvolution of multi-cellular pixel resolution ST data can  
205 provide distinct insights from clustering analysis. To demonstrate this, we again simulated ST  
206 data using mixtures of single cells assayed by scRNA-seq (Supplementary Methods).  
207 Specifically, we simulated ST pixels comprised of mixtures of either luminal cells and pericytes  
208 or pericytes and macrophages (Figure 3D). Applying clustering analysis to these ST pixels, we  
209 identified 2 clusters corresponding to either mixtures of luminal cells and pericytes or mixtures  
210 of pericytes and macrophages (Figure 3E). In contrast, applying STdeconvolve with  $K=3$ , we  
211 were able to recover the proportional representations of luminal cells, pericytes, and  
212 macrophages as well as their original cell-type specific transcriptional profiles (Figure 3F).

213 Such differences between deconvolution and clustering analysis extends to resolution  
214 enhancing clustering approaches such as BayesSpace<sup>21</sup>. Briefly, BayesSpace utilizes a spatial  
215 prior that encourages spatially neighboring pixels to cluster into the same transcriptional cluster.  
216 Enhanced resolution clustering is obtained after subdividing each pixel and modeling the  
217 expression profiles of the subpixels as additional latent parameters estimated in the Bayesian

218 model. Applying BayesSpace with 3 clusters to our simulated ST data, we obtained 3 spatially  
219 discrete clusters corresponding to different mixtures of luminal cells and pericytes and mixtures  
220 of pericytes and macrophages (Figure 3G, Supplementary Methods). Compared to  
221 STdeconvolve, both regular transcriptional clustering and resolution enhanced clustering with  
222 BayesSpace exhibited significantly higher RMSE (Diebold-Mariano  $p$ -value  $< 2.2 \times 10^{-16}$ )  
223 (Figure 3H).

224 To further demonstrate the difference between deconvolution and clustering analysis for  
225 ST data, we again simulated ST data using a single-cell resolution MERFISH dataset of a  
226 coronal section of the mouse brain<sup>22</sup>. We analyzed the single-cell resolution transcriptional  
227 profiles to identify 20 transcriptionally distinct cell-types and again simulated multi-cellular  
228 pixel-resolution ST data by aggregating the single cells into  $100 \mu\text{m}^2$  pixels (Figure 3I,  
229 Supplementary Figure S5A-B, Supplementary Methods). The organization of cell-types within  
230 the mouse brain is highly complex with many regions including the thalamus at the central  
231 region of this coronal section being composed of mixtures of multiple transcriptionally distinct  
232 cell-types. We thus sought to evaluate whether STdeconvolve could better recover the  
233 proportional representation of cell-types compared to resolution enhanced clustering with  
234 BayesSpace. Applying both STdeconvolve and BayesSpace, we generally recover the cell-type  
235 pixel proportions and visually recapitulate the spatial organization of cell-types within various  
236 brain structures (Figure 3J-K, Supplementary Methods). However, focusing in on the central  
237 region of the coronal section encompassing the thalamus, we indeed saw a visual difference  
238 between the spatial organization of cell-types recovered by deconvolution via STdeconvolve  
239 compared to resolution enhanced clustering via BayesSpace (Figure 3J-K inset). Quantifying  
240 performance, BayesSpace exhibited significantly higher RMSE compared to STdeconvolve

241 (Diebold-Mariano  $p$ -value  $< 2.2 \times 10^{-16}$ ) as a whole (Supplementary Fig S5C, though more  
242 discernably in the thalamus region (Figure 3L). Taken together, deconvolution approaches such  
243 as STdeconvolve can provide distinct results from clustering and resolution enhanced clustering  
244 approaches when applied to multi-cellular pixel resolution data.

245

### 246 **STdeconvolve characterizes the spatial organization of transcriptionally distinct cell-types** 247 **in real ST data**

248 Having demonstrated the capacity of STdeconvolve to recover cell-type proportions and  
249 transcriptional profiles in simulated ST data, we next sought to evaluate the performance of  
250 STdeconvolve by analyzing real  $100 \mu\text{m}^2$  resolution ST data of the mouse main olfactory bulb  
251 (MOB)<sup>23</sup>. The MOB consists of multiple bilaterally symmetric and transcriptionally distinct cell  
252 layers due to topographically organized sensory inputs<sup>24</sup>. While previous clustering analysis of  
253 ST data of the MOB revealed coarse spatial organization of coarse cell layers, finer structures  
254 such as the rostral migratory stream (RMS) could not be readily observed (Supplementary Figure  
255 S6A-B). We applied STdeconvolve to identify  $K=12$  cell-types (Figure 4A, Supplementary  
256 Figure S6C, Supplementary Methods) that either overlapped with or further split coarse cell  
257 layers previously identified from clustering analysis (Supplementary Figure S6D). In particular,  
258 deconvolved cell-type X7 overlapped with the granule cell layer previously identified from  
259 clustering analysis and was spatially placed where the RMS is expected<sup>25</sup> (Figure 4B).  
260 Upregulated genes in its deconvolved transcriptional profile, including *Nrep*, *Sox11*, and *Dcx*, are  
261 known to be associated with neuronal differentiation and upregulated in neuronal precursor cells  
262 within the RMS<sup>26</sup> (Figure 4C, Supplementary Figure S6E). Higher resolution ISH staining of  
263 these genes further demarcates a region within the granule cell layer where the RMS is

264 expected<sup>19</sup> (Figure 4D). This suggests that deconvolved cell-type X7 may correspond to the  
265 neuronal precursor cell-type within the RMS unidentified from clustering analysis.

266 To further evaluate the biological reproducibility of deconvolved cell-types, we applied  
267 STdeconvolve independently to 3 additional biological replicates of ST data of the MOB  
268 (Supplementary Methods). In each biological replicate, STdeconvolve consistently identified  
269 approximately 12 cell-types (Supplementary Figure S7A). Transcriptional profiles between  
270 deconvolved cell-types were also highly correlated across biological replicates (Supplementary  
271 Figure S7B-D). This suggests that STdeconvolve can reliably deconvolve consistent cell-types,  
272 even across biological replicates.

273 As noted previously using simulated ST data, the performance of reference-based  
274 deconvolution approaches is sensitive to differences in cell-type composition between the single-  
275 cell transcriptomics reference and the ST data to be deconvolved. To demonstrate this with real  
276 ST data, we first compared STdeconvolve and reference-based deconvolution approaches using  
277 an appropriate MOB scRNA-seq reference<sup>27</sup> (Supplementary Methods). We found strong  
278 correlations between cell-type proportions estimated by STdeconvolve and other reference-based  
279 deconvolution approaches with a high degree of correspondence among all evaluated methods  
280 (Supplementary Figure S8A-B). Notably, the proportion and transcriptional profile of  
281 deconvolved cell-type X8 identified by STdeconvolve to be enriched in the olfactory nerve layer  
282 correlated strongly with the proportion of olfactory ensheathing cells (OECs) identified by the  
283 reference-based deconvolution approaches.

284 Next, to simulate a less suitable scRNA-seq reference, we removed OECs from the MOB  
285 scRNA-seq reference and again evaluated the performance of reference-based deconvolution  
286 approaches given this new scRNA-seq reference without OECs (Supplementary Methods).

287 Again, as a reference-free deconvolution approach, the results of STdeconvolve do not change.  
288 However, for some reference-based deconvolution approaches, given this new reference without  
289 OECs, pixels in the olfactory nerve layer previously comprised of OECs were now predicted to  
290 be comprised of N2 cells (Supplementary Figure S9A). Although we do not know the ground  
291 truth cell-type composition of this olfactory nerve layer, we have reasons to believe that this  
292 placement of N2 cells is erroneous. First, when a scRNA-seq reference with OECs was used,  
293 reference-based deconvolution approaches generally estimated N2 cells to be relatively rare.  
294 However, when a scRNA-seq reference without OECs was used, reference-based deconvolution  
295 approaches substantially increased their estimated abundance of N2 cells (Supplementary Figure  
296 S9B). Second, while the transcriptional profiles of OECs and N2 cells are highly correlated  
297 (Supplementary Figure S9C), the two cell-types exhibit significant transcriptionally differences.  
298 For example, top differentially upregulated genes in OECs are highly expressed in the olfactory  
299 nerve layer (Supplementary Figure S8C) whereas top differentially upregulated genes in N2 cells  
300 are not well detected in the olfactory nerve layer (Supplementary Figure S9D). This lack of  
301 detection of N2 cell marker genes within the olfactory nerve layer coupled with the rarity of N2  
302 cells in the original reference-based deconvolution with OECs suggests that the placement of N2  
303 cells in the olfactory nerve layer by reference-based deconvolution approaches when using a  
304 reference without OECs is erroneous.

305 Further, a single-cell transcriptomics reference may not always exist for the same tissue  
306 from which ST data was generated, prompting the use of a reference from a related but  
307 inherently different tissue source. To evaluate the potential effect of using a single-cell  
308 transcriptomics reference from a different tissue source on reference-based deconvolution  
309 approaches, we sought to deconvolve the MOB ST data using the scRNA-seq reference from the

310 mouse brain described previously. Given this mouse brain reference, pixels in the olfactory nerve  
311 layer previously comprised of OECs were now predicted to be comprised of vascular  
312 leptomeningeal cells (VLMC) (Supplementary Figure S10A). Again, although we do not know  
313 the ground truth cell-type composition of this olfactory nerve layer, top differentially upregulated  
314 genes in VLMCs are not well detected in the MOB (Supplementary Figure S10B) and are  
315 therefore likely not truly present. Taken together, all this suggests that reference-based  
316 deconvolution approaches are sensitive to the cell-types represented in the single-cell  
317 transcriptomics reference that is used, which may lead to inaccurate results and spurious cell-  
318 type assignments when a suitable reference is not available.

319

## 320 **STdeconvolve is applicable across diverse ST dataset resolutions and technologies**

321 We anticipate that continual technological improvements will enhance the resolution of  
322 ST data. Already, ST technologies such as Visium (10X Genomics), Slide-seq<sup>28</sup>, and DBiT-seq<sup>29</sup>  
323 have achieved resolution that can range from 50  $\mu\text{m}^2$  to 10  $\mu\text{m}^2$ . Therefore, we sought to  
324 evaluate the performance of STdeconvolve on higher resolution ST data using both simulated as  
325 well as real ST data from higher resolution ST technologies including Visium, Slide-seq, and  
326 DBiT-seq.

327 First, to simulate higher resolution ST data, we again aggregated single-cell resolution  
328 MERFISH data of the MPOA into 50, 20, and 10  $\mu\text{m}^2$  resolution pixels. Applying  
329 STdeconvolve, we observed similarly strong correlations between the deconvolved cell-type  
330 transcriptional profiles and proportions with the ground truth (Supplementary Figure S11A-D).  
331 Although the number of cells in each multi-cellular pixel did decrease as the resolution of the  
332 pixel increased as expected, we note that even higher resolution pixels may still contain multiple

333 cells representing multiple cell-types (Supplementary Figure S11E-F). Thus, deconvolution may  
334 still be applicable to higher resolution ST data and STdeconvolve can still accurately deconvolve  
335 cell-types within these higher resolution multi-cellular pixels.

336 Encouraged by STdeconvolve's ability to recover cell-types in simulated high-resolution  
337 ST data, we then applied STdeconvolve to real high-resolution multi-cellular ST data from  
338 several different technologies. First, we applied STdeconvolve to 50  $\mu\text{m}^2$  resolution ST data of a  
339 coronal section of the mouse brain from 10X Visium<sup>30</sup>. Briefly, for 10XVisium, mRNAs from  
340 tissue sections are captured onto an array of DNA barcoded spots, resulting in RNA-sequencing  
341 measurements with gridded 2D spatial positional information. We applied STdeconvolve to  
342 identify  $K=20$  cell-types that exhibit spatially distinct patterns that demarcate known brain  
343 structures such as the isocortex and fiber tracts (Figure 4E, Supplementary Figure S12,  
344 Supplementary Methods).

345 We next applied STdeconvolve to 25  $\mu\text{m}^2$  resolution ST data of the lower body of the  
346 E11 mouse embryo from DBiT-seq. Briefly, for DBiT-seq, parallel microfluidic channels are  
347 used to deliver DNA barcodes to the surface of a tissue to enable direct barcoding of mRNAs *in*  
348 *situ*, resulting in RNA-sequencing measurements in a 2D mosaic of spatial pixels. Previously, the  
349 authors identified 13 transcriptionally and spatially distinct features in the E11 mouse embryo  
350 including the atrium, ventricle, liver, and blood vessels containing erythrocyte coagulation.  
351 Applying STdeconvolve with  $K=13$ , we identify deconvolved cell-types that corresponded with  
352 similar spatially distinct features in agreement with the original findings (Figure 4F,  
353 Supplementary Figure S13A, Supplementary Methods). Moreover, the top genes in the  
354 deconvolved cell-type specific transcriptional profiles contained the expected marker genes of  
355 the matching features, such as *Myh6* for the atrium, *Myh7* for the ventricle, *Apoa2* for the liver,



356 and *Hba.a2* for the blood vessels containing erythrocyte coagulation in agreement with the  
357 original findings (Supplementary Figure S13B).

358 Finally, we applied STdeconvolve to 10  $\mu\text{m}^2$  resolution ST data of the mouse cerebellum  
359 from Slide-seq. Briefly, for Slide-seq, mRNAs from tissue sections are captured onto densely  
360 packed barcoded beads, resulting in RNA-sequencing measurements with 2D spatial positional  
361 information. Previously, RCTD was also applied to this Slide-seq dataset with a matched Drop-  
362 seq scRNA-seq reference of the mouse cerebellum<sup>31</sup> to identify beads representing a distinct  
363 layers of Purkinje neurons and Bergmann glia. Applying STdeconvolve, we identified  $K=14$  cell-  
364 types (Figure 4G, Supplementary Methods) whose transcriptional profiles correlated strongly  
365 with cell-types from the scRNA-seq dataset of the mouse cerebellum (Supplementary Figure  
366 S14A). In particular, we found that the deconvolved transcriptional profiles of cell-type X4 and  
367 cell-type X2 correlated strongly with the transcriptional profiles of Purkinje neurons and  
368 Bergmann glia. Likewise, the deconvolved proportional representation of cell-type X4 and cell-  
369 type X2 also agreed significantly (Fisher's Exact  $p$ -value  $< 2.2 \times 10^{-16}$ ) with the predicted  
370 proportions of Purkinje neuron and Bergmann glia from RCTD (Supplementary Figure S14B-C).  
371 Taken together, these results indicate that STdeconvolve can be applicable to a range of multi-  
372 cellular resolution ST technologies.

373 As the resolution of ST data improves, the number of spatially resolved pixels and cell-  
374 types represented in the data will presumably also increase. We therefore sought to evaluate the  
375 scalability of STdeconvolve in anticipation of these increasingly larger datasets. To this end, we  
376 benchmarked the runtime and total memory usage by STdeconvolve when deconvolving varying  
377 numbers of cell-types using varying numbers of genes across varying numbers of pixels  
378 (Methods). We found that both the runtime and memory usage by STdeconvolve increased

379 linearly with the number of pixels and genes in the input dataset (Supplementary Figure S15A)  
380 and is comparable to existing reference-based deconvolution methods when applied to current  
381 ST datasets<sup>5</sup>. Likewise, runtime scales with the number of deconvolved cell-types  $K$  in the input  
382 dataset though memory usage remains stable (Supplementary Figure S15B). To enhance runtime  
383 efficiency, STdeconvolve has built in parallelization. In this manner, we anticipate that  
384 STdeconvolve will be amenable to larger ST data.

385

### 386 **STdeconvolve identifies immune infiltrates in breast cancer**

387 Finally, to demonstrate the potential of an unsupervised, reference-free deconvolution  
388 approach, we applied STdeconvolve to 100  $\mu\text{m}^2$  resolution ST data of 4 breast cancer sections<sup>32</sup>.  
389 Here, a matched scRNA-seq reference was not available and using a scRNA-seq reference from  
390 another breast cancer sample may be inappropriate due to potential inter-tumoral heterogeneity<sup>33</sup>.  
391 Transcriptional clustering of the ST pixels previously identified 3 transcriptionally distinct  
392 clusters that corresponded to 3 histological regions of the tissue: ductal carcinoma *in situ* (DCIS),  
393 invasive ductal carcinoma (IDC), and non-malignant<sup>32</sup> (Figure 5A, Supplementary Figure 16A-  
394 B). However, the tumor microenvironment is a complex milieu of many additional cell-types<sup>34</sup>.  
395 We thus applied STdeconvolve to identify potential additional cell-types and interrogate their  
396 spatial organization, resulting in  $K=15$  identified cell-types (Figure 5B, Supplementary Figure  
397 S16C, Online Methods). Of these, deconvolved cell-types X3 and X13 pixel proportions  
398 corresponded spatially with pixels annotated as the non-malignant and DCIS regions,  
399 respectively (Supplementary Figure S16D). Likewise, the deconvolved expression profiles for  
400 X3 and X13 included *KRT1*, a keratin gene specifically expressed in mammary myoepithelial  
401 cells<sup>35</sup>, and *PRSS23*, a serine protease associated with proliferation of breast cancer cells<sup>36</sup>,

402 respectively, consistent with the non-malignant and DCIS annotations (Supplementary Figure  
403 S17). Interestingly, the deconvolved expression profile for cell-type X15 included immune genes  
404 such as *CD74* and *CXCL10* (Figure 5C-E, Supplementary Figure S18). Gene set enrichment  
405 analysis also suggested that genes in the deconvolved expression profile for cell-type X15 was  
406 significantly enriched in immune processes such as T cell activation (Supplementary Table S1,  
407 Online Methods). This suggests that deconvolved cell-type X15 may correspond to immune  
408 infiltrates. Further, we find a significant the number of pixels with a high proportion of  
409 deconvolved cell-type X15 corresponding to IDC regions (Fisher's exact  $p$ -value = 0.001257)  
410 based on previous clustering and pathology annotations. In contrast, we do not see a significant  
411 number of pixels with a high proportion of deconvolved cell-type X15 corresponding to DCIS  
412 regions (Fisher's exact  $p$ -value = 0.5625). This is consistent with previous observations that  
413 when comparing pure DCIS and IDC, infiltration of immune cells was significantly higher in  
414 IDC to pure DCIS<sup>37,38</sup>.

415         The spatial organization of immune cells within tumors has been previously implicated to  
416 be relevant in breast cancer prognosis<sup>39</sup>. In particular, whether immune cells are infiltrated or  
417 excluded from the tumor is associated with tumor microenvironments that stratify patient  
418 outcomes<sup>40</sup>. To evaluate whether STdeconvolve may be able to distinguish infiltrated versus  
419 excluded spatial organization of immune cells in tumors, we simulated ST data representing  
420 infiltrated and excluded spatial organizations using mixtures of single cells assayed by scRNA-  
421 seq (Figure 5F, Online Methods). In both the simulated infiltrated and excluded cases, we find  
422 that STdeconvolve can effectively recover the cell-type transcriptional profiles (Figure 5G) and  
423 enable the quantification of immune infiltration to help distinguish between infiltrated versus  
424 excluded spatial organization of immune cells (Figure 5H). Therefore, we anticipate that

425 STdeconvolve may be able to assist in deconvolving cell-types in heterogeneous cancer tissues  
426 to recover potentially clinically interesting spatial organizational patterns.

427

## 428 **Discussion**

429 Multi-cellular pixel-resolution ST technologies have enabled high-throughput  
430 transcriptomic profiling of small mixtures of cells within tissues but accurate identification of the  
431 underlying cell-types within each pixel is critical for elucidating cell-type specific spatial  
432 organizational patterns and gene expression variation. Although several deconvolution methods  
433 have already been developed to address this challenge, they currently rely on suitable single-cell  
434 transcriptomics references. As we have shown, this reliance on single-cell transcriptomics  
435 references constrains the spatial mapping of cell-types to those in the reference, which may  
436 present limitations if there are missing cell-types, mismatched cell-types, perturbations, and  
437 batch effect differences between the single-cell transcriptomics reference and ST data to be  
438 deconvolved. Here, we have presented STdeconvolve, a reference-free computational approach  
439 to deconvolve cell-type proportions and their transcriptional profiles in multi-cellular pixel  
440 resolution ST data. We have demonstrated that STdeconvolve can accurately recover underlying  
441 cell-type proportions and their transcriptional profiles across a range of different ST technologies  
442 and resolutions. STdeconvolve further provides competitive performance to reference-based  
443 deconvolution approaches when an ideal single-cell transcriptomics reference is available and  
444 potentially better performance in more realistic circumstances where such an ideal reference is  
445 not available. Additionally, we showed the advantage of deconvolution over clustering-based  
446 analysis methods to interrogate heterogeneous mixtures of cell-types. Likewise, using simulated  
447 ST data of aged-perturbed tissues, we showed that STdeconvolve can recover perturbation-

448 driven cell-type-specific gene expression changes. Finally, we applied STdeconvolve to identify  
449 putative immune infiltration in real and simulated breast cancer ST data.

450         Though we have shown that STdeconvolve can effectively recover cell-type proportions  
451 and transcriptional profiles in simulated and real ST data, its use of LDA modeling relies on  
452 several underlying assumptions, which may present limitations when these assumptions are not  
453 satisfied. Notably, the performance of LDA in accurately deconvolving cell-types depends on the  
454 size of the dataset with respect to the number of pixels and the number of genes<sup>41</sup>. As such,  
455 deconvolution accuracy generally decreases for ST data containing fewer than 10 pixels  
456 (Supplementary Figure S19). While we have generally found the number of pixels in most ST  
457 datasets to be well beyond 10 pixels after quality control filtering, the application of ST to profile  
458 tissue slivers or other thin structures covering only a few pixels may present challenges to  
459 deconvolution by STdeconvolve. Further, LDA modeling attempts to identify tightly occurring,  
460 and ideally non-overlapping groups of genes in the pixels as cell-types. In this manner, if genes  
461 do not exhibit variability across pixels due to a homogeneous or uniform proportional  
462 representation of cell-types across pixels (Supplementary Figure S20), STdeconvolve may fail to  
463 deconvolve distinct cell-types. Likewise, if the gene expression in the ST data is too sparse with  
464 high rates of stochastic drop-outs<sup>42</sup>, then the LDA model may struggle to identify distinct groups  
465 of co-expressed genes and as such STdeconvolve may also struggle to deconvolve distinct cell-  
466 types as well. Still, when such failures happen, STdeconvolve will indicate to users when distinct  
467 cell-types are not detected.

468         Although we have demonstrated the applicability of STdeconvolve to high resolution  
469 multi-cellular pixel resolution ST data, as the resolution of ST data continues to increase, sub-  
470 cellular pixel-resolution ST technologies will also become more accessible. Already, a number

471 sub-cellular pixel-resolution ST technologies have emerged<sup>43-47</sup>. As the capture efficiency at this  
472 resolution and likewise the biological questions of interest may differ substantially from multi-  
473 cellular ST data, we anticipate that new methods specifically suited for sub-cellular resolution ST  
474 data will be needed. Thus, STdeconvolve may not be best suited to analysis of such sub-cellular  
475 resolution ST data. Still, as we have noted previously, even as the resolution of ST data  
476 increases, some pixels may still contain multiple cells representing multiple cell-types,  
477 suggesting that deconvolution may still be necessary. Likewise, the number of cells present in a  
478 pixel ultimately will depend on cell size, which can vary depending on the organism, tissue,  
479 and/or disease state being profiled. Ultimately, we believe that there will be a need to balance  
480 between resolution and throughput of ST technologies depending on the biological question of  
481 interest. The potentially larger tissue regions able to be covered by multi-cellular pixel resolution  
482 ST data may still be of interest and thus still require deconvolution. We anticipate that  
483 STdeconvolve will be applicable to data from a variety of current and future ST technologies as  
484 well as potentially inferred ST data<sup>48</sup> to reveal cell-type specific spatial organizational patterns  
485 and transcriptional changes. In general, we foresee that reference-free deconvolution approaches  
486 such as STdeconvolve will contribute to the interrogation of the spatial relationships between  
487 transcriptionally distinct cell-types in heterogeneous tissues.

488

489 **Methods**

490

491 **STdeconvolve Overview**

492 STdeconvolve uses latent Dirichlet allocation (LDA)<sup>49</sup>, a generative probabilistic model, to  
493 deconvolve the latent cell-types contained within multi-cellular pixels of spatially resolved  
494 transcriptome (ST) measurements. In this context, each pixel is defined as a mixture of  $K$  cell-  
495 types represented as a multinomial distribution of cell-type probabilities ( $\theta$ ), and each cell-type  
496 is defined as a probability distribution over the genes ( $\beta$ ) present in the ST dataset.

497

498 LDA Modeling

499 The ST dataset is represented as a  $D \times N$  matrix of discrete gene expression counts for each  
500 pixel  $d$  and gene  $n$ . The total number of unique molecules, or total gene expression, in a given  
501 pixel  $d$  is  $M_d$ .

502

503 As a generative probabilistic model, the LDA model generates a set of new pixels as follows:

504

505 For each pixel  $d$ :

506 a. draw a cell-type distribution  $\theta_d \sim Dir(\alpha)$ , where  $\theta_d$  is a multinomial distribution of  
507 length  $K$  drawn from a uniform Dirichlet distribution with scaling parameter  $\alpha$ .

508 b. for each observed molecule  $m$  in  $M_d$ :

509 i. draw cell-type assignment  $z_{d,m} \sim mult(\theta_d)$

510 ii. draw a gene  $w_{d,m} \sim mult(\beta_{z_{d,m}})$

511

512 The central goal is to identify the posterior distribution of the latent parameters given the input  
513 data, where for each pixel  $d$ :

$$514 \quad p(\theta_d, \mathbf{z} \mid \mathbf{w}, \alpha, \beta) = \frac{p(\theta_d, \mathbf{z}, \mathbf{w} \mid \alpha, \beta)}{p(\mathbf{w} \mid \alpha, \beta)}$$

515 where  $\mathbf{z}$  is a vector of  $M_d$  cell-types assigned to each unique molecule in pixel  $d$ , and  $\mathbf{w}$  is the  
516 vector of  $M_d$  genes assigned to each unique molecule for pixel  $d$ . A variational expectation-  
517 maximization approach is used to estimate the values of the latent parameters<sup>49,50</sup>. By default,  $\beta$   
518 is initialized with 0 for all cell-types and genes, and  $\alpha$  as  $50/K$ .

519

520 The resulting estimated  $\theta$  and  $\beta$  matrices represent the deconvolved proportions of cell-types in  
521 each pixel and the gene expression profiles for each cell-type, scaled to a library size of 1.  $\beta$   
522 represents a  $K \times N$  gene-probability (*i.e.*, expression) matrix for each cell-type  $k$  and each gene  
523  $n$  with each row summing to 1. The  $\beta$  matrix can be multiplied by a scaling factor of one million  
524 to be more like conventional counts-per-million expression values for interpretability.  $\theta$   
525 represents a  $D \times K$  pixel-cell-type proportion matrix for each pixel  $d$  and each cell-type  $k$ . LDA  
526 modeling in STdeconvolve is implemented through the `topicmodels` R package<sup>50</sup>.

527

528 Of note, LDA assumes for each cell-type that there is a group of genes highly co-expressed with  
529 high probability. Therefore, STdeconvolve uses feature selection for genes more likely to be  
530 highly co-expressed within cell-types, which can improve cell-type deconvolution.

531

### 532 *Selection of genes for LDA model*

533 Latent cell-types are best discovered by LDA modeling if cell-type specific marker genes  
534 are included in the input ST data while genes whose expression is shared across cell-types are



535 excluded. Therefore, to filter for genes that are more likely to be specifically expressed in  
536 particular cell-types to improve cell-type deconvolution by LDA, STdeconvolve first removes  
537 genes that are not detected in a sufficient number of pixels. By default, genes detected in less  
538 than 5% of pixels are removed. Likewise, STdeconvolve also removes genes that are expressed  
539 in all pixels. By default, genes detected in 100% of pixels are removed. STdeconvolve then  
540 selects for significantly overdispersed genes, or genes with higher-than-expected expression  
541 variance across pixels, as a means to detect transcriptionally distinct cell-types<sup>15</sup>. We assume that  
542 the proportion of cell-types will vary across pixels and thus differences in their cell-type-specific  
543 transcriptional profiles manifest as overdispersed genes across pixels in the dataset.

544 If there are too many genes included in the input ST data, LDA may also struggle to  
545 identify non-overlapping clusters composed of distinct combinations of co-expressed genes. In  
546 these circumstances, users may modulate the number of informative genes included in the input  
547 matrix to ensure LDA convergence. By default, only the top 1000 most overdispersed genes are  
548 retained in the input ST data.

549 Additional gene filtering or cell-type specific marker genes to include in the input ST  
550 data may also be augmented by the user.

551

### 552 Selection of LDA model with optimal number of cell-types

553 The number of cell-types  $K$  in the LDA model must be chosen *a-priori*. To determine the  
554 optimal number of cell-types  $K$  to choose for a given dataset, we fit a set of LDA models using  
555 different values for  $K$  over a user defined range of positive integers greater than 1. We then  
556 compute the perplexity of each fitted model:

$$557 \text{Perplexity}(D) = \exp \left\{ -\frac{\log(p(D))}{\sum_{d=1}^D \sum_{n=1}^N c_{d,n}} \right\}$$

558 Where  $p(D)$  is the likelihood of the dataset and  $c_{d,n}$  is the gene count, or expression level, of  
559 gene  $n$  in pixel  $d$ . We can interpret  $p(D)$  as the posterior likelihood of the dataset conditional on  
560 the cell-type assignments using the final estimated  $\theta$  and  $\beta$ . The lower the perplexity, the better  
561 the model represents the real dataset. Thus, the trend between choice of  $K$  and the respective  
562 model perplexity can then serve as a guide. By default, the perplexity is computed by comparing  
563  $p(D)$  to the entire input dataset used to estimate  $\theta$  and  $\beta$ .

564 In addition, STdeconvolve also reports the trend between  $K$  and the number of  
565 deconvolved cell-types with mean pixel proportions  $< 5\%$  (as default). We chose this default  
566 threshold based on the difficulty of STdeconvolve and reference-based deconvolution  
567 approaches to deconvolve cell-types at low proportions, (i.e., “rare” cell-types) (Supplementary  
568 Note 2). We note that as  $K$  is increased for fitted LDA models, the number of such “rare” cell-  
569 types generally increases. Such rare deconvolved cell-types are often distinguished by fewer  
570 distinct transcriptional patterns in the data and may represent non-relevant or spurious  
571 subdivisions of primary cell-types. We can use this metric to help set an upper bound on  $K$ .

572 Generally, perplexity decreases and the number of “rare” deconvolved cell-types  
573 increases as  $K$  increases. Given these model perplexities and number of “rare” deconvolved cell-  
574 types for each tested  $K$ , the optimal  $K$  can then be determined by choosing the maximum  $K$  with  
575 the lowest perplexity while minimizing number of “rare” deconvolved cell-types. To further  
576 guide the choice of  $K$ , an inflection point (“knee”) is derived from the maximum second  
577 derivative of the plotted  $K$  versus perplexity plot and  $K$  versus number of “rare” deconvolved  
578 cell-types.

579 Still, for a given  $K$ , the fitted LDA model may fail to identify distinct cell-types e.g., the  
580 distribution of cell-type proportions in each pixel is uniform. In such a situation, the Dirichlet

581 distribution shape parameter  $\alpha$  of the LDA model will be  $\geq 1$  and STdeconvolve will indicate to  
582 the user that the fitted LDA model for a particular  $K$  has an  $\alpha$  above this threshold by greying out  
583 these  $K$ s in the trend plot.

584 Ultimately, the choice of  $K$  is left up to the user and can be chosen taking into  
585 consideration prior knowledge of the biological system.

586

### 587 **Simulating ST data from single-cell resolution spatially resolved MERFISH data**

588 MERFISH data of the mouse medial preoptic area (MPOA) was obtained from the original  
589 publication<sup>16</sup>. Normalized gene expression values were converted back to counts by dividing by  
590 1000 and multiplying by each cell's absolute volume. Datasets for an untreated female animal  
591 (FN7, datasets 171021\_FN7\_2\_M22\_M26 and 171023\_FN7\_1\_M22\_M26) containing counts  
592 for 135 genes assayed by MERFISH were used. Genes with non-count expression intensities  
593 assayed by sequential FISH were omitted. Counts of blank control measurements were also  
594 removed. Cells were previously annotated as being one of 9 major cell-types (astrocyte,  
595 endothelial, microglia, immature or mature oligodendrocyte, ependymal, pericyte, inhibitory  
596 neuron, excitatory neuron). Cells originally annotated as "ambiguous" were removed from the  
597 dataset to ensure the ground truth was composed of cells with distinguishable cell-types. Because  
598 certain cell-types may be enriched in specific regions of the MPOA, we combined 12 tissue  
599 sections across the anterior and posterior regions to ensure that all expected cell-types would be  
600 well represented in the final simulated ST dataset. After filtering, the final dataset contained  
601 59651 cells representing 9 total cell-types and counts for the 135 genes.

602 To simulate a multi-cellular pixel resolution ST dataset from such single-cell resolution  
603 spatially resolved MERFISH data, we generated a grid of squares, each square with an area of

604  $100 \mu\text{m}^2$ . Each square was considered a simulated pixel and the gene counts of cells whose x-y  
605 centroid was located within the coordinates of a square pixel were summed together. A grid of  
606 square pixels was generated for each of the 12 tissue sections separately and the simulated pixels  
607 for all 12 tissue sections were subsequently combined into a single ST dataset. For a given tissue  
608 section, the bottom edge of the grid was the lowest y-coordinate of the cell centroids and the left  
609 edge of the grid was the lowest x-coordinate. Square boundaries were then drawn from each of  
610 these edges in  $100 \mu\text{m}^2$  increments until the position of the farthest increment from the origin  
611 was greater than the highest respective cell centroid coordinate. After generating the grid, square  
612 pixels whose edges formed one of the outside edges of the grid were discarded in order to  
613 remove simulated pixels, which by virtue of their placement, encompassed space outside of the  
614 actual tissue sample. The retained pixels covered 49142 out of the original 59651 cells in the 12  
615 tissue sections. This resulted in a simulated ST dataset with 3072 pixels by 135 genes. We used  
616 the original cell-type labels of each cell to compute the ground truth proportions in each  
617 simulated pixel. Likewise, to generate the ground truth transcriptional profiles of each cell-type,  
618 we averaged the gene counts for cells of the same cell-type from the original 59651 cells and  
619 normalized the resulting gene count matrix to sum to 1 for each cell-type. To simulate pixels of  
620  $50$ ,  $20$ , and  $10 \mu\text{m}^2$ , an identical approach was taken using the same cells except those square  
621 boundaries were drawn from each edge in  $50$ ,  $20$ , or  $10 \mu\text{m}^2$  increments.

622

### 623 **Annotation and matching of deconvolved and ground truth cell-types**

624 Each deconvolved cell-type was first matched with the ground truth cell-type that had the highest  
625 Pearson's correlation between their transcriptional profiles. This was done by computing the

626 Pearson's correlation between every combination of deconvolved and ground truth cell-type  
627 transcriptional profiles.

628         The assignment of deconvolved cell-types to ground truth cell-types was confirmed by  
629 testing for enrichment of differentially upregulated genes of the ground truth cell-types in the  
630 deconvolved cell-type transcriptional profiles. To determine the differentially upregulated genes  
631 of the ground truth cell-types, ground truth transcriptional profiles were converted to counts per  
632 thousand and low expressed genes, defined as those with average expression values less than 5,  
633 were removed. For each ground truth cell-type, the  $\log_2$  fold-change of each remaining gene with  
634 respect to the average expression across the other ground-truth cell-types was computed.  
635 Differentially upregulated genes were those with  $\log_2$  fold-change  $> 1$ . We performed rank-based  
636 gene set enrichment analysis of the ground truth upregulated gene sets in each deconvolved cell-  
637 type transcriptional profile using the `liger` R package<sup>51</sup>. A match to a ground truth cell-type was  
638 confirmed and assigned if the ground truth gene set had the lowest gene set enrichment adjusted  
639  $p$ -value that was at least  $< 0.05$ , followed by the highest positive edge score<sup>52</sup>, and then highest  
640 positive enrichment score to break ties.

641

#### 642 **Deconvolution of additional simulated and real ST data**

643 Deconvolution of simulated and real ST data using STdeconvolve in addition to deconvolution  
644 of simulated and real ST data using supervised and semi-supervised reference-based  
645 deconvolution approaches with various single-cell transcriptomics references is further detailed  
646 in Supplementary Methods.

647

#### 648 **Comparison of deconvolution approaches**

649 How each supervised and semi-supervised deconvolution approach was run is further detailed in  
650 the Supplementary Methods. To compare the performance between deconvolution methods, the  
651 root mean squared error (RMSE) was computed for each pixel between the deconvolved and  
652 matched ground truth cell-type proportions for each pixel in the ST dataset:

$$653 \quad RMSE = \sqrt{\frac{\sum_{k=1}^K (\hat{y}_k - y_k)^2}{K}}$$

654 where  $K$  is the number of cell-types,  $\hat{y}_k$  is the predicted cell-type proportion for the cell-type  $k$ ,  
655 and  $y_k$  is the ground truth cell-type proportion for the cell-type  $k$ . To assess whether the  
656 distribution of pixel RMSEs was significantly lower for STdeconvolve compared to other  
657 methods, a one-sided Diebold-Mariano Test<sup>53</sup> was used.

658

### 659 **Runtime and memory evaluation**

660 Using the Visium dataset described in Supplementary Methods '*Deconvolution of 10X Visium*  
661 *data with STdeconvolve*', we generated an input ST dataset of 2702 pixels and feature selected  
662 for the top 1000 most significant overdispersed genes. Runtime of STdeconvolve was measured  
663 on randomly drawn subsets of input data. Five subsets are drawn with 2702 pixels and 50, 100,  
664 200, 400, and 1000 genes, respectively. Another five subsets are drawn with the 1000 top  
665 overdispersed genes and 50, 100, 200, 400, and 1000 pixels, respectively. All subsets are  
666 deconvolved with cell type number ( $K$ ) between 4 and 20 as input parameters. Runtime was  
667 measured using the R package '*microbenchmark*'<sup>54</sup> (v1.4-7). Memory usage of STdeconvolve  
668 was measured using a similar sub-setting procedure and the R package '*profmem*'<sup>55</sup> (v0.6.0).  
669 Total memory allocation was measured, which provides an upper bound for peak memory usage.

670 Runtime and memory analyses were run on a machine with i7-6600U 2.60GHz CPU with 8GM  
671 of RAM.

672

### 673 **Availability of Code**

674 STdeconvolve is available as an open-source R software package<sup>56</sup> with the source code  
675 available in the Supplemental Material and on GitHub at [https://github.com/JEFworks-](https://github.com/JEFworks-Lab/STdeconvolve)  
676 [Lab/STdeconvolve](https://github.com/JEFworks-Lab/STdeconvolve). Additional documentation and tutorials are available at  
677 <https://jef.works/STdeconvolve/>

678

### 679 **Acknowledgements**

680 Research reported in this publication was supported by the National Institute of General Medical  
681 Sciences of the National Institutes of Health under Award Number R35-GM142889.

682

683 **References**

684

685 1 Zhuang, X. Spatially resolved single-cell genomics and transcriptomics by imaging. *Nat*  
686 *Methods* **18**, 18-22, doi:10.1038/s41592-020-01037-8 (2021).

687 2 Larsson, L., Frisen, J. & Lundeberg, J. Spatially resolved transcriptomics adds a new  
688 dimension to genomics. *Nat Methods* **18**, 15-18, doi:10.1038/s41592-020-01038-7  
689 (2021).

690 3 Elosua-Bayes, M., Nieto, P., Mereu, E., Gut, I. & Heyn, H. SPOTlight: seeded NMF  
691 regression to deconvolute spatial transcriptomics spots with single-cell transcriptomes.  
692 *Nucleic Acids Res*, doi:10.1093/nar/gkab043 (2021).

693 4 Cable, D. M. *et al.* Robust decomposition of cell type mixtures in spatial transcriptomics.  
694 *Nat Biotechnol*, doi:10.1038/s41587-021-00830-w (2021).

695 5 Dong, R. & Yuan, G. C. SpatialDWLS: accurate deconvolution of spatial transcriptomic  
696 data. *Genome Biol* **22**, 145, doi:10.1186/s13059-021-02362-7 (2021).

697 6 Song, Q. & Su, J. DSTG: deconvoluting spatial transcriptomics data through graph-based  
698 artificial intelligence. *Brief Bioinform* **22**, doi:10.1093/bib/bbaa414 (2021).

699 7 Kiemen, A. *et al.* In situ characterization of the 3D microanatomy of the pancreas and  
700 pancreatic cancer at single cell resolution. *bioRxiv*, 2020.2012.2008.416909,  
701 doi:10.1101/2020.12.08.416909 (2020).

702 8 Nguyen, Q. H., Pervolarakis, N., Nee, K. & Kessenbrock, K. Experimental  
703 Considerations for Single-Cell RNA Sequencing Approaches. *Front Cell Dev Biol* **6**, 108,  
704 doi:10.3389/fcell.2018.00108 (2018).



- 705 9 Network, B. I. C. C. A multimodal cell census and atlas of the mammalian primary motor  
706 cortex. *Nature* **598**, 86-102, doi:10.1038/s41586-021-03950-0 (2021).
- 707 10 Hu, B. C. The human body at cellular resolution: the NIH Human Biomolecular Atlas  
708 Program. *Nature* **574**, 187-192, doi:10.1038/s41586-019-1629-x (2019).
- 709 11 Regev, A. *et al.* The Human Cell Atlas. *bioRxiv*, 121202, doi:10.1101/121202 (2017).
- 710 12 Deutsch, A., Feng, D., Pessin, J. E. & Shinoda, K. The Impact of Single-Cell Genomics  
711 on Adipose Tissue Research. *Int J Mol Sci* **21**, doi:10.3390/ijms21134773 (2020).
- 712 13 Haque, A., Engel, J., Teichmann, S. A. & Lonnberg, T. A practical guide to single-cell  
713 RNA-sequencing for biomedical research and clinical applications. *Genome Med* **9**, 75,  
714 doi:10.1186/s13073-017-0467-4 (2017).
- 715 14 Dey, K. K., Hsiao, C. J. & Stephens, M. Visualizing the structure of RNA-seq expression  
716 data using grade of membership models. *PLoS Genet* **13**, e1006599,  
717 doi:10.1371/journal.pgen.1006599 (2017).
- 718 15 Fan, J. *et al.* Characterizing transcriptional heterogeneity through pathway and gene set  
719 overdispersion analysis. *Nat Methods* **13**, 241-244, doi:10.1038/nmeth.3734 (2016).
- 720 16 Moffitt, J. R. *et al.* Molecular, spatial, and functional single-cell profiling of the  
721 hypothalamic preoptic region. *Science* **362**, doi:10.1126/science.aau5324 (2018).
- 722 17 Tasic, B. *et al.* Adult mouse cortical cell taxonomy revealed by single cell  
723 transcriptomics. *Nat Neurosci* **19**, 335-346, doi:10.1038/nn.4216 (2016).
- 724 18 Hawrylycz, M. J. *et al.* An anatomically comprehensive atlas of the adult human brain  
725 transcriptome. *Nature* **489**, 391-399, doi:10.1038/nature11405 (2012).
- 726 19 Lein, E. S. *et al.* Genome-wide atlas of gene expression in the adult mouse brain. *Nature*  
727 **445**, 168-176, doi:10.1038/nature05453 (2007).

- 728 20 Li, C. M. *et al.* Aging-Associated Alterations in Mammary Epithelia and Stroma  
729 Revealed by Single-Cell RNA Sequencing. *Cell Rep* **33**, 108566,  
730 doi:10.1016/j.celrep.2020.108566 (2020).
- 731 21 Zhao, E. *et al.* Spatial transcriptomics at subspot resolution with BayesSpace. *Nat*  
732 *Biotechnol*, doi:10.1038/s41587-021-00935-2 (2021).
- 733 22 Vizgen Data Release V1.0. May 2021.
- 734 23 Stahl, P. L. *et al.* Visualization and analysis of gene expression in tissue sections by  
735 spatial transcriptomics. *Science* **353**, 78-82, doi:10.1126/science.aaf2403 (2016).
- 736 24 Nagayama, S., Homma, R. & Imamura, F. Neuronal organization of olfactory bulb  
737 circuits. *Front Neural Circuits* **8**, 98, doi:10.3389/fncir.2014.00098 (2014).
- 738 25 Hintiryan, H. *et al.* Comprehensive connectivity of the mouse main olfactory bulb:  
739 analysis and online digital atlas. *Front Neuroanat* **6**, 30, doi:10.3389/fnana.2012.00030  
740 (2012).
- 741 26 Wang, C. *et al.* Identification and characterization of neuroblasts in the subventricular  
742 zone and rostral migratory stream of the adult human brain. *Cell Res* **21**, 1534-1550,  
743 doi:10.1038/cr.2011.83 (2011).
- 744 27 Tepe, B. *et al.* Single-Cell RNA-Seq of Mouse Olfactory Bulb Reveals Cellular  
745 Heterogeneity and Activity-Dependent Molecular Census of Adult-Born Neurons. *Cell*  
746 *Rep* **25**, 2689-2703 e2683, doi:10.1016/j.celrep.2018.11.034 (2018).
- 747 28 Rodriques, S. G. *et al.* Slide-seq: A scalable technology for measuring genome-wide  
748 expression at high spatial resolution. *Science* **363**, 1463-1467,  
749 doi:10.1126/science.aaw1219 (2019).

- 750 29 Liu, Y. *et al.* High-Spatial-Resolution Multi-Omics Sequencing via Deterministic  
751 Barcoding in Tissue. *Cell* **183**, 1665-1681 e1618, doi:10.1016/j.cell.2020.10.026 (2020).  
752 30 <https://www.10xgenomics.com/resources/datasets>.
- 753 31 Saunders, A. *et al.* Molecular Diversity and Specializations among the Cells of the Adult  
754 Mouse Brain. *Cell* **174**, 1015-1030 e1016, doi:10.1016/j.cell.2018.07.028 (2018).
- 755 32 Yoosuf, N., Navarro, J. F., Salmen, F., Stahl, P. L. & Daub, C. O. Identification and  
756 transfer of spatial transcriptomics signatures for cancer diagnosis. *Breast Cancer Res* **22**,  
757 6, doi:10.1186/s13058-019-1242-9 (2020).
- 758 33 Karaayvaz, M. *et al.* Unravelling subclonal heterogeneity and aggressive disease states in  
759 TNBC through single-cell RNA-seq. *Nat Commun* **9**, 3588, doi:10.1038/s41467-018-  
760 06052-0 (2018).
- 761 34 Wei, R., Liu, S., Zhang, S., Min, L. & Zhu, S. Cellular and Extracellular Components in  
762 Tumor Microenvironment and Their Application in Early Diagnosis of Cancers. *Anal*  
763 *Cell Pathol (Amst)* **2020**, 6283796, doi:10.1155/2020/6283796 (2020).
- 764 35 Karantza, V. Keratins in health and cancer: more than mere epithelial cell markers.  
765 *Oncogene* **30**, 127-138, doi:10.1038/onc.2010.456 (2011).
- 766 36 Chan, H. S. *et al.* Serine protease PRSS23 is upregulated by estrogen receptor alpha and  
767 associated with proliferation of breast cancer cells. *PLoS One* **7**, e30397,  
768 doi:10.1371/journal.pone.0030397 (2012).
- 769 37 Kim, M. *et al.* Immune microenvironment in ductal carcinoma in situ: a comparison with  
770 invasive carcinoma of the breast. *Breast Cancer Res* **22**, 32, doi:10.1186/s13058-020-  
771 01267-w (2020).

- 772 38 Beguinot, M. *et al.* Analysis of tumour-infiltrating lymphocytes reveals two new  
773 biologically different subgroups of breast ductal carcinoma in situ. *BMC Cancer* **18**, 129,  
774 doi:10.1186/s12885-018-4013-6 (2018).
- 775 39 Keren, L. *et al.* A Structured Tumor-Immune Microenvironment in Triple Negative  
776 Breast Cancer Revealed by Multiplexed Ion Beam Imaging. *Cell* **174**, 1373-1387 e1319,  
777 doi:10.1016/j.cell.2018.08.039 (2018).
- 778 40 Grusso, T. *et al.* Spatially distinct tumor immune microenvironments stratify triple-  
779 negative breast cancers. *J Clin Invest* **129**, 1785-1800, doi:10.1172/JCI96313 (2019).
- 780 41 Jian, T., Zhaoshi, M., Xuanlong, N., Qiaozhu, M. & Ming, Z. 190-198 (PMLR, 2014).
- 781 42 Asp, M., Bergenstrahle, J. & Lundeberg, J. Spatially Resolved Transcriptomes-Next  
782 Generation Tools for Tissue Exploration. *Bioessays* **42**, e1900221,  
783 doi:10.1002/bies.201900221 (2020).
- 784 43 Eng, C. L. *et al.* Transcriptome-scale super-resolved imaging in tissues by RNA  
785 seqFISH. *Nature* **568**, 235-239, doi:10.1038/s41586-019-1049-y (2019).
- 786 44 Xia, C., Fan, J., Emanuel, G., Hao, J. & Zhuang, X. Spatial transcriptome profiling by  
787 MERFISH reveals subcellular RNA compartmentalization and cell cycle-dependent gene  
788 expression. *Proc Natl Acad Sci U S A* **116**, 19490-19499, doi:10.1073/pnas.1912459116  
789 (2019).
- 790 45 Wang, X. *et al.* Three-dimensional intact-tissue sequencing of single-cell transcriptional  
791 states. *Science* **361**, doi:10.1126/science.aat5691 (2018).
- 792 46 Wang, F. *et al.* RNAscope: a novel in situ RNA analysis platform for formalin-fixed,  
793 paraffin-embedded tissues. *J Mol Diagn* **14**, 22-29, doi:10.1016/j.jmoldx.2011.08.002  
794 (2012).

- 795 47 Codeluppi, S. *et al.* Spatial organization of the somatosensory cortex revealed by  
796 osmFISH. *Nat Methods* **15**, 932-935, doi:10.1038/s41592-018-0175-z (2018).
- 797 48 Levy-Jurgenson, A., Tekpli, X., Kristensen, V. N. & Yakhini, Z. Spatial transcriptomics  
798 inferred from pathology whole-slide images links tumor heterogeneity to survival in  
799 breast and lung cancer. *Sci Rep* **10**, 18802, doi:10.1038/s41598-020-75708-z (2020).
- 800 49 Blei, D. M. a. N., Andrew Y and Jordan, Michael I. Latent dirichlet allocation. *The*  
801 *Journal of Machine Learning Research* **3**, 993-1022 (2003).
- 802 50 Grün, B. & Hornik, K. topicmodels: An R Package for Fitting Topic Models. *2011* **40**,  
803 30, doi:10.18637/jss.v040.i13 (2011).
- 804 51 Fan, J. Differential Pathway Analysis. *Methods Mol Biol* **1935**, 97-114, doi:10.1007/978-  
805 1-4939-9057-3\_7 (2019).
- 806 52 Subramanian, A. *et al.* Gene set enrichment analysis: a knowledge-based approach for  
807 interpreting genome-wide expression profiles. *Proc Natl Acad Sci U S A* **102**, 15545-  
808 15550, doi:10.1073/pnas.0506580102 (2005).
- 809 53 Diebold, F. X. & Mariano, R. S. Comparing Predictive Accuracy. *Journal of Business &*  
810 *Economic Statistics* **13**, 253-263, doi:10.1080/07350015.1995.10524599 (1995).
- 811 54 Accurate Timing Functions. <https://github.com/joshualrich/microbenchmark/>.
- 812 55 Simple Memory Profiling for R. <https://github.com/HenrikBengtsson/profmem>.
- 813 56 R Core Team. R: A language and environment for statistical computing. *R Foundation*  
814 *for Statistical Computing* (2021).

815

816 **Figure Legends**

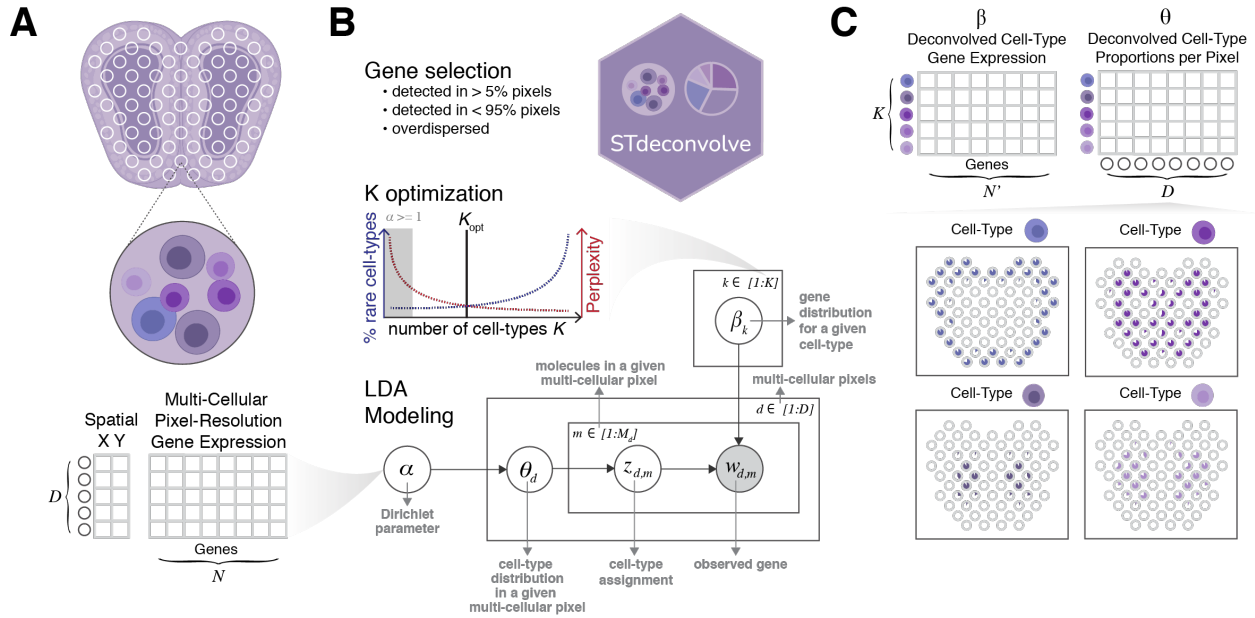

817

818 **Figure 1. Overview of STdeconvolve.** A) STdeconvolve takes as input a spatial transcriptomics

819 (ST) gene counts matrix of  $D$  pixels (rows) by  $N$  genes (columns). A matrix of spatial

820 coordinates for each of the  $D$  pixel can also be used for visualization. B) STdeconvolve first

821 feature selects genes for deconvolution, such as genes with counts in more than 5% and less than

822 95% of the pixels, and overdispersed across the pixels. STdeconvolve then guides the selection

823 of the optimal number of cell-types to be deconvolved,  $K$ . STdeconvolve finally applies LDA

824 modeling. A graph representation of LDA modeling and the parameters to be learned is shown.

825 Shaded circle indicates observed variables and clear circles indicate latent variables. C)

826 STdeconvolve outputs two matrices: (1)  $\beta$ , the deconvolved transcriptional profile matrix of  $K$

827 cell-types over  $N'$  feature selected genes, and (2)  $\theta$ , the proportions of  $K$  cell-types across the  $D$

828 pixels. The proportion of deconvolved cell-types can then be visualized across the pixels.

829

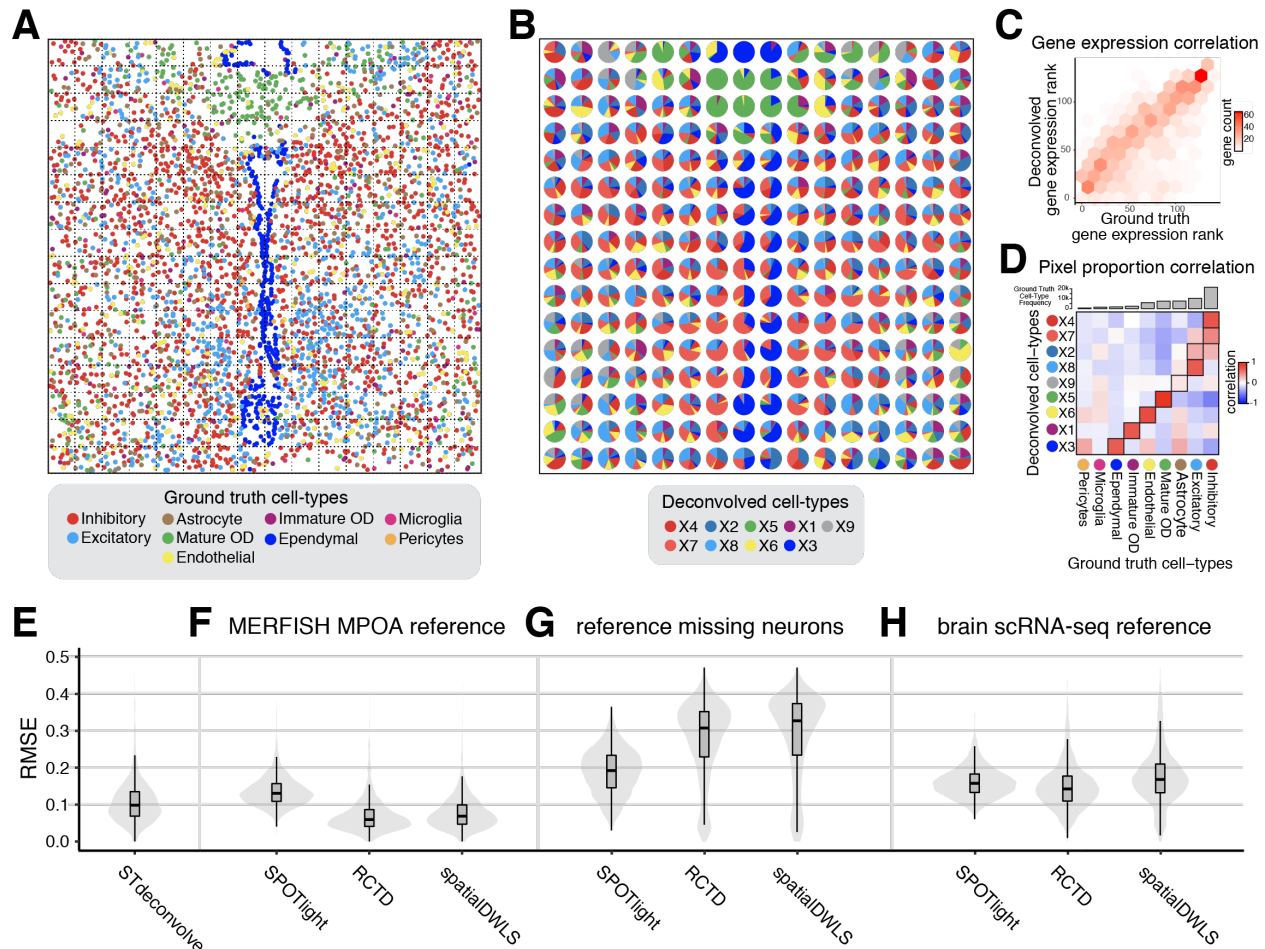

830  
831

832 **Figure 2. Deconvolution of simulated ST data.** A) Ground truth single-cell resolution  
 833 MERFISH data of one section of the MPOA partitioned into 100  $\mu\text{m}^2$  pixels (black dashed  
 834 squares). Each dot is a single cell colored by its ground truth cell-type label. B) Proportions of  
 835 deconvolved cell-types from STdeconvolve represented as pie charts for each simulated pixel. C)  
 836 The ranking of each gene based on its expression level in the deconvolved cell-type  
 837 transcriptional profiles compared to its gene rank in the matched ground truth cell-type  
 838 transcriptional profiles. C) Heatmap of Pearson's correlations between the deconvolved cell-type  
 839 proportions and ground truth cell-types proportions across simulated pixels. D) Ground truth  
 840 cell-types are ordered by their frequencies in the ground truth dataset. Matched deconvolved and  
 841 ground truth cell-types are boxed. E) Root-mean-square-error (RMSE) of the deconvolved cell-



842 type proportions compared to ground truth for STdeconvolve, F) for supervised deconvolution  
843 approaches using the ideal single cell transcriptomics MERFISH MPOA reference, G) for  
844 supervised deconvolution approaches using the single cell transcriptomics MERFISH MPOA  
845 reference with missing neurons, and H) for supervised deconvolution approaches using a brain  
846 single-cell RNA-seq reference.  
847



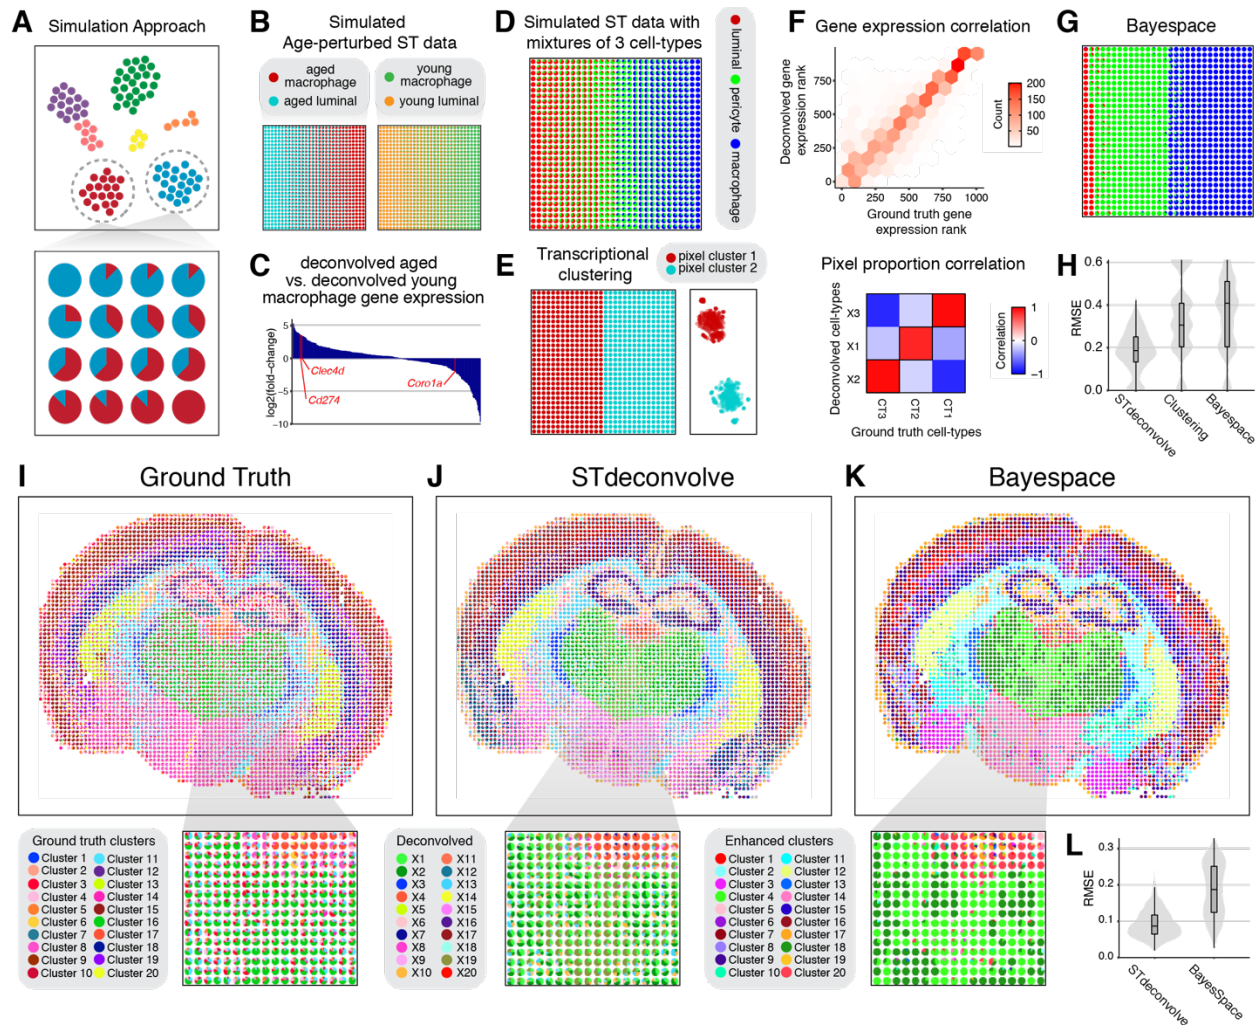

848

849 **Figure 3. Comparing clustering versus deconvolution analysis for ST data.** A) Overview of  
 850 simulation approach. Starting from a single-cell RNA-seq clustering result visualized as a 2D  
 851 tSNE embedding with cells colored by cell-type (top), gene expression counts from cells are  
 852 combined to simulate cell-type mixtures, with the proportions of cell-types are represented as pie  
 853 charts for each arbitrary spatial pixel (bottom). B) Simulated ST datasets of aged and young  
 854 tissues using mixtures of aged macrophages with aged luminal cells and young macrophages  
 855 with young luminal cells respectively represented as pie charts for each simulated ST pixel. C)  
 856 Bar chart of  $\log_2$  fold-change for deconvolved aged macrophage versus deconvolved young  
 857 macrophage gene expression. Select genes are highlighted in red. D) Simulated ST dataset with 3

858 cell-types represented as pie charts for each simulated ST pixel. E) Clustering analysis results of  
859 simulated ST dataset with 3 cell-types. Pie chart proportional representation (left) and tSNE  
860 representation (right). F) Deconvolution results for the simulated ST dataset with 3 cell-types by  
861 STdeconvolve. The ranking of each gene based on its expression level in the deconvolved-cell-  
862 type transcriptional profiles compared to its gene rank in the matched ground truth cell-type  
863 transcriptional profiles (top). Heatmap of Pearson's correlations between the deconvolved cell-  
864 types proportions and ground truth cell-types proportions across simulated pixels (bottom). G)  
865 BayesSpace enhanced resolution clustering results for the simulated ST dataset with 3 cell-types  
866 represented as pie charts. H) Root-mean-square-error (RMSE) of the deconvolved cell-type  
867 proportions compared to ground truth for the simulated ST dataset with 3 cell-types. I) Ground  
868 truth cell-type proportions derived from single-cell resolution MERFISH data of the mouse brain  
869 partitioned into 100  $\mu\text{m}^2$  pixels. J) Deconvolved cell-type proportions for the mouse brain by  
870 STdeconvolve. K) Enhanced resolution clustering for the mouse brain by BayesSpace. Inset  
871 highlights an interior region corresponding approximately to the thalamus. L) Root-mean-square-  
872 error (RMSE) of the deconvolved cell-type proportions compared to single-cell clustering for the  
873 MERFISH mouse brain data for the inset interior region corresponding approximately to the  
874 thalamus.  
875

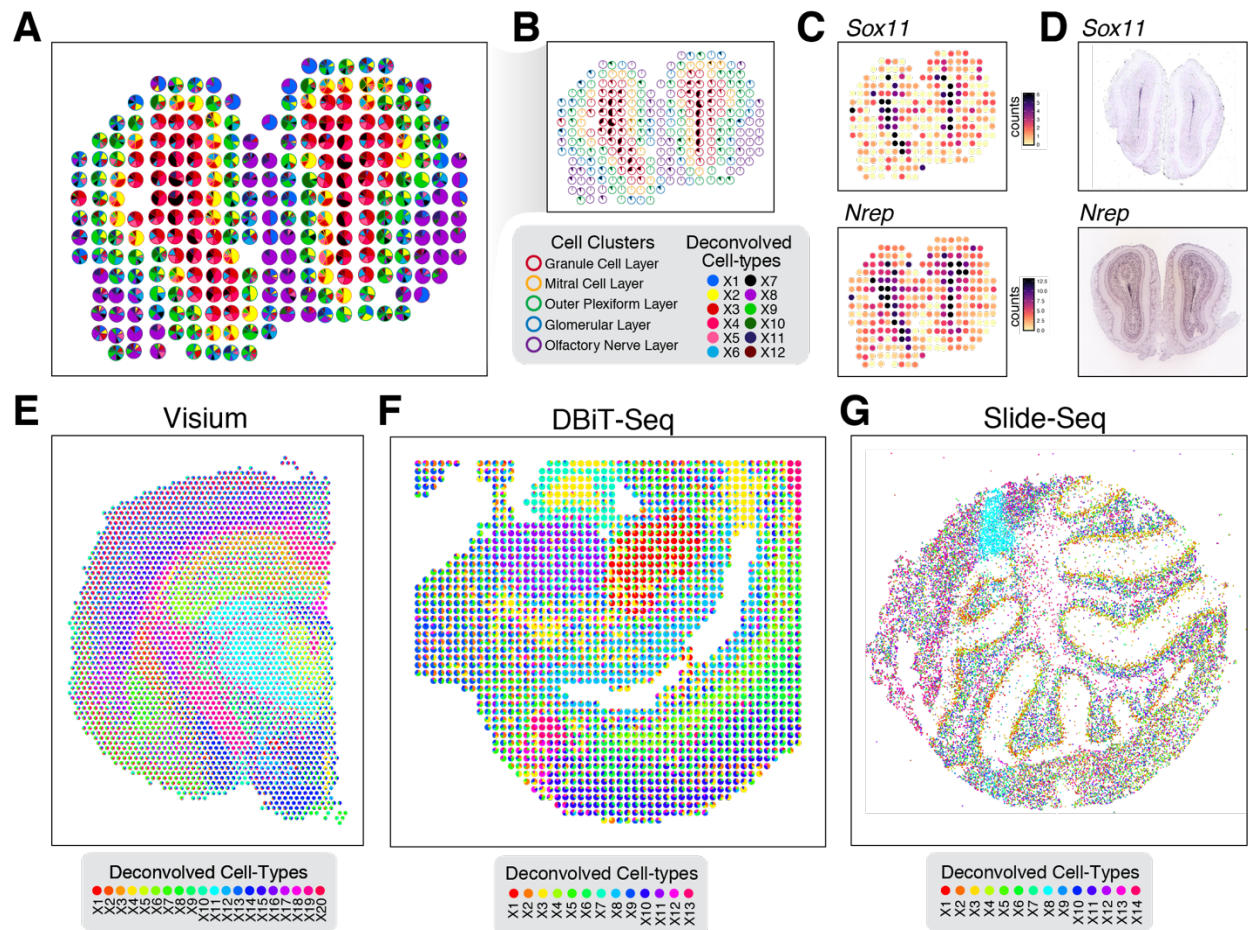

876

877 **Figure 4. Deconvolution of ST data of varying resolution from multiple technologies by**

878 **STdeconvolve.** A) Deconvolved cell-type proportions for ST data of the MOB, represented as

879 pie charts for each ST pixel. Pixels are outlined with colors based on the pixel transcriptional

880 cluster assignment corresponding to MOB coarse cell layers. B) Highlight of deconvolved cell-

881 type X7. Pixel proportion of deconvolved cell-type X7 are indicated as black slices in pie charts.

882 Pixels are outlined with colors as in A). C) Gene counts in each pixel of the MOB ST dataset for

883 deconvolved cell-type X7's select top marker genes *Sox11* and *Nrep*. D) Corresponding ISH

884 images for *Sox11* and *Nrep* from the Allen Brain Atlas<sup>19</sup>. E) Deconvolved cell-type proportions

885 for Visium data of the mouse brain. F) Deconvolved cell-type proportions for DBiT-seq data of

886 the lower body of an E11 mouse embryo. G) Deconvolved cell-type proportions for Slide-seq  
887 data of the mouse cerebellum.



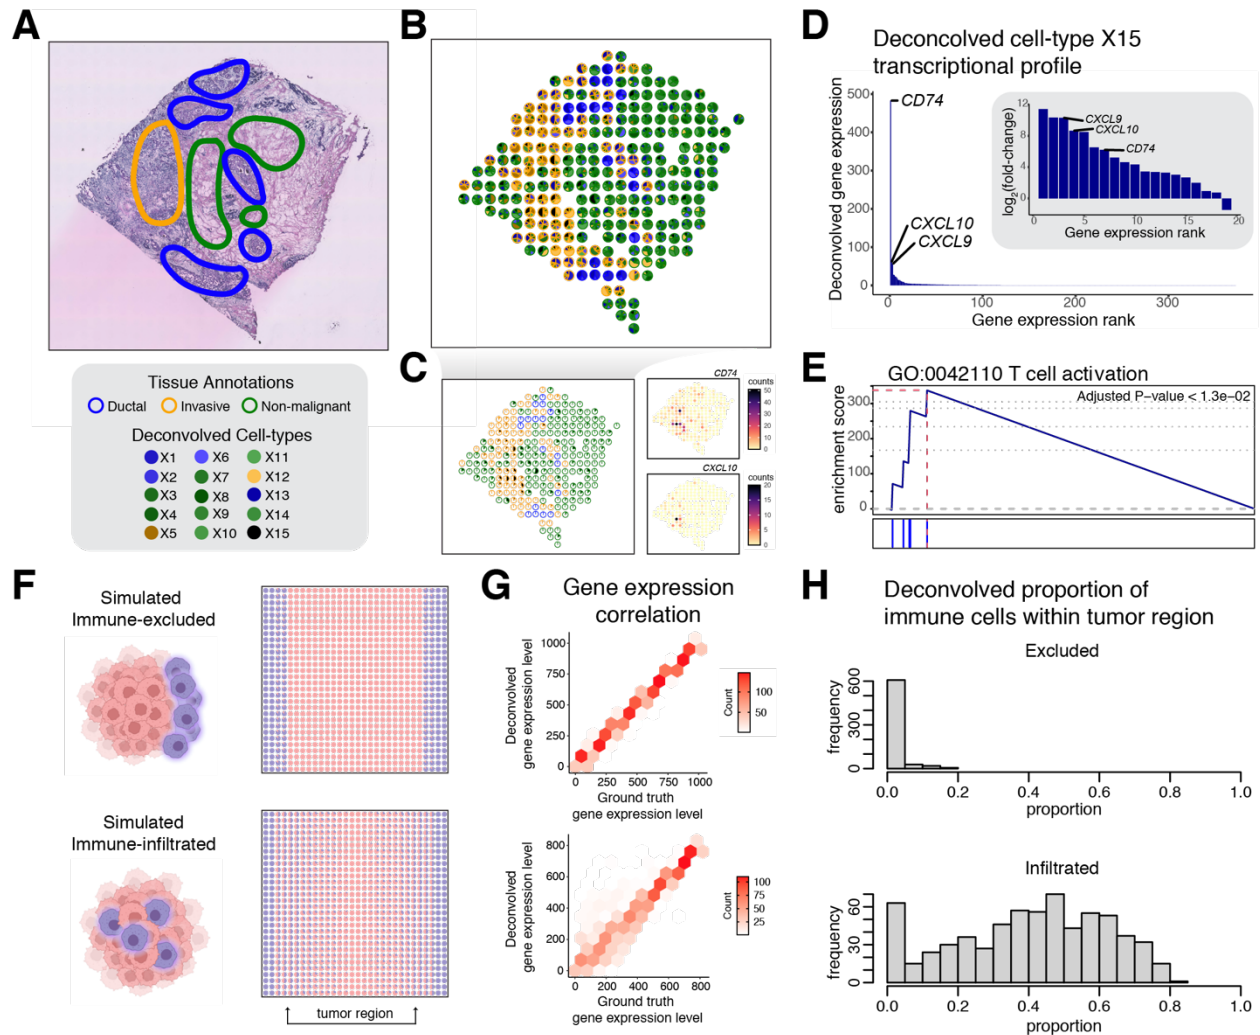

888  
889

890 **Figure 5. STdeconvolve characterizes the spatial organization of immune cells in real and**

891 **simulated breast cancer ST data.** A) An H&E-stained image of the breast cancer tissue with

892 pathological annotations adapted from Yoosuf *et al.*<sup>32</sup>. B) Deconvolved cell-type pixel

893 proportions for ST data of a breast cancer tissue section, represented as pie charts. Pixels are

894 outlined with colors based on the pixel transcriptional cluster assignment corresponding to 3

895 pathological annotations. C) Highlight of deconvolved cell-type X15. Pixel proportion of

896 deconvolved cell-type X15 are indicated as black slices in pie charts. Pixels are outlined with

897 colors as in B). Select genes corresponding cell-type X15's select top marker genes are shown.

898 D) Barplot of the deconvolved transcriptional profile of cell-type X15 ordered by magnitude.  
899 Inset represents the  $\log_2$  fold-change of the deconvolved transcriptional profile of cell-type X15  
900 with respect to the mean expression of the other 14 deconvolved cell-type transcriptional  
901 profiles. Select highly expressed and high fold-change genes are labeled. E) Gene set enrichment  
902 plot for significantly enriched GO term “T cell activation” for deconvolved cell-type X15. F)  
903 Simulated ST datasets of an immune-excluded tumor sample (top) and immune-infiltrated tumor  
904 sample (bottom) using mixtures of single cells represented as pie charts for each simulated ST  
905 pixel. G) Deconvolution results for the simulated ST data by STdeconvolve. The ranking of each  
906 gene based on its expression level in the deconvolved-cell-type transcriptional profiles compared  
907 to its gene rank in the matched ground truth cell-type transcriptional profiles for the simulated  
908 immune-excluded tumor sample (top) and immune-infiltrated tumor sample (bottom). H)  
909 Histogram of the deconvolved proportion of immune cells in the tumor region defined in (F) for  
910 the simulated immune-excluded tumor sample (top) and immune-infiltrated tumor sample  
911 (bottom).  
912
